# Supplementary material
Source: HighWire-hosted journal article supplement (https://erj.ersjournals.com/content/52/3/1800412)
Supplement: inline-supplementary-material-1 [file inline-supplementary-material-1.pdf]

## **Search strategy**

PubMed, EMBASE and the Cochrane Library were searched to identify relevant literature. The search strategy included various terms for the MCID determination of HRQoL questionnaires and/or health status measurement tools and/or PROs in adults with COPD (Supplementary Table 1). The search was conducted on the 9th of June 2015 and updated regularly with the final update on the 16th of June 2017. It included all studies and research designs prior to this.

## **Study criteria**

Studies were considered eligible if they included approaches and original measurement data for the MCID of a generic or disease-specific HRQoL questionnaire and/or health status instrument and/or PRO used in a COPD population. HRQoL and health status instruments were considered eligible when they captured more than one domain of the concepts physical, psychological and social functioning [1-2]. In COPD patients, this would include concepts such as breathlessness, fatigue, cough, sputum production, physical functioning, social functioning, mental well-being and exacerbations [16]. The term health status will be used for future reference in this review. Only full-text studies containing original data were included. Conference abstracts, editorials and opinion articles were excluded. Reviews were initially included to explore the references. Non-English publications were translated if considered eligible.

## **Study selection**

Titles and abstracts of the identified articles were screened by two authors (HA and CdJ) independently. The screening process included: (1) the study design and type was identified; (2) the measurement tool was identified; (3) a judgement was made whether the tool was a questionnaire or PRO, which measured health status according to the predefined inclusion definition; (4) the population was identified and screened for adults with COPD; (5) the aim of the study was identified, which needed to determine the instrument's MCID; (6) a description of the MCID methodology and final quantitative estimates should be available; (7) final judgement for eligibility was made. Independent results from both authors were compared. Where disagreement occurred, this was discussed and consensus was reached, or a third author (IT, TvdM or RS) was consulted. Full-text articles were retrieved for the selected studies and again checked according to the above stated seven steps. The

reference lists of the selected articles were screened for additional titles. The abstracts of the additional titles were screened accordingly for meeting the pre-defined inclusion criteria.

### **Quality assessment and risk of bias**

Eligible full text articles were assessed for their quality and risk of bias by two authors (HA and CdJ) independently. Disagreement was discussed and consensus was reached. The authors composed a quality assessment and risk of bias tool by selecting 31 relevant items from various sources, because there was no specific evaluation tool available for evaluating studies that measure an instrument's MCID (Supplementary Table 2). Furthermore, various research designs were included, which made it difficult to use one checklist.

Items on study methodology and questionnaire design were selected from the Cochrane Risk of Bias tool [67] and the COSMIN checklist [68]. These items concerned the attrition and missing data procedures; selective outcome reporting; risk of funding and ownership bias; availability of at least two health status measurements; time interval of measurement stated; similar test conditions for both measurements; follow-up completed; validation and properties of the health status tool described; floor- and ceiling effects described; whether the MCID was calculated; and whether criterion/anchors used were considered golden standard. Additional items were retrieved from the systematic reviews by Bohannon et al. [58-59]: clear inclusion/exclusion criteria; systematic enrollment of patients; missing data percentage less than 25%; more than one anchor used; and the use of Receiver Operating Characteristics (ROC) Curves with an Area Under the Curve (AUC) of at least 0.70. The current authors added the following items based upon recommendations in the literature [2, 33, 45, 69]: adequate description of the anchor and its properties; anchor correlations at least 0.50; Global Rating of Change (GRC) used with 11 or more scoring options; type of clinical criterion used; more than one distribution-based method used; MCID for more than one population measured; and whether the MCID was determined for improvement, deterioration or both.

The general scoring of the quality assessment and risk of bias included the answering options “yes”, “no”, “unclear” and “not applicable”, as deducted from the COSMIN checklist [68]. “Not applicable” was selected for MCID related items that were not relevant for the corresponding study. Positive answers / low bias items were scored two points; unclear items were scored one point; and negative answers / high bias / not applicable items were scored zero points. Individual items were scored and presented. An overall total score with a maximum of 62 could be obtained. Five categories were defined for the overall quality stratification, which were required for

triangulation procedures. Summed scores of 0-12 were qualified one star; 13-25 two stars; 26-37 three stars; 38-49 four stars; and 50-62 five stars as overall risk of bias and quality rating.

### **Data extraction, synthesis and analysis**

Data were extracted using a standardized form including the general article properties; study properties; patient characteristics; health status measurements; and MCID properties (methodology, type of change, type of MCID, MCID estimates, and missing data procedures). Results from the full-text analysis were categorized per identified health status tool. Data were presented in tables and figures. A narrative synthesis of the MCID results, its methodology and its quality was prepared per instrument including forest plots. Primary outcome measures were the quality assessment of the MCIDs for health status tools in COPD, an overview of its MCID methods and estimates; as well as triangulation of the MCIDs where multiple studies per instrument existed. Since no standard for triangulation exists, the authors determined the final triangulation as following: Triangulation was executed by first determining an anchor-based and distribution-based MCID per included study. The anchor-based result received a weight of 2/3, while the distribution-based method received a weight of 1/3. The results were multiplied by a weighted factor for its study size (N) and quality rating (1-5 stars). An overall weighted triangulated mean MCID was calculated per health status tool.

*Supplementary Table S1: Search strategy (PICO) and search dates for PubMed, EMBASE and the Cochrane Library*

| Database | Search terms                                                                                                                                                                                                                                                                                                                                                                                                                                                                                                                                                                                                                                                                                                                                                                                                                                                                                                                                                                                                                                                                                                                                                                                                                                                                                                                                                                                                                                                                                                                                                                                                                                                                                                                                                                                                                                                                                                                                                                                                                                                                                                                                                                                                                                                                                                                                        | Search date                                                                                                                                           |
|----------|-----------------------------------------------------------------------------------------------------------------------------------------------------------------------------------------------------------------------------------------------------------------------------------------------------------------------------------------------------------------------------------------------------------------------------------------------------------------------------------------------------------------------------------------------------------------------------------------------------------------------------------------------------------------------------------------------------------------------------------------------------------------------------------------------------------------------------------------------------------------------------------------------------------------------------------------------------------------------------------------------------------------------------------------------------------------------------------------------------------------------------------------------------------------------------------------------------------------------------------------------------------------------------------------------------------------------------------------------------------------------------------------------------------------------------------------------------------------------------------------------------------------------------------------------------------------------------------------------------------------------------------------------------------------------------------------------------------------------------------------------------------------------------------------------------------------------------------------------------------------------------------------------------------------------------------------------------------------------------------------------------------------------------------------------------------------------------------------------------------------------------------------------------------------------------------------------------------------------------------------------------------------------------------------------------------------------------------------------------|-------------------------------------------------------------------------------------------------------------------------------------------------------|
| PubMed   | <p>P - Concept Patients with COPD</p> <p>"Pulmonary Disease, Chronic Obstructive"[Mesh] OR COPD [tw] OR Chronic Obstructive Pulmonary Dis* [tw] OR Obstructive Pulmonary Dis* [tw] OR Pulmonary Dis* [tw] OR Chronic Obstructive Airway Dis* [tw] OR Obstructive Airway Dis* [tw] OR Airflow Limitation* [tw] OR Airflow Obstruction* [tw] OR Chronic Bronchitis [tw] OR Bronchitis [tw] OR Emphysema [tw] OR Chronic Airway Dis* [tw] OR Respiratory Dis* [tw]</p> <p>AND</p> <p>I - Concept Patient reported health status questionnaires</p> <p>Patient-reported outcome*[tw] OR Patient Reported Outcome*[tw] OR PRO [tw] OR "Health Status"[Mesh] OR health status[tw] OR "Health Status Indicators"[Mesh] OR "Quality of Life"[Mesh] OR Quality Of Life [tw] OR QoL [tw] OR "Questionnaires"[Mesh] OR Questionnaire* [tw]</p> <p>AND</p> <p>C – none</p> <p>AND</p> <p>O – Minimal Clinically Important Difference (MCID)</p> <p>MCID [tw] OR MID [tw] OR minimum clinically important difference*[tw] OR minimum clinical important difference*[tw] OR minimum important difference*[tw] OR minimal clinically important difference*[tw] OR minimal clinical important difference*[tw] OR minimal important difference* [tw] OR minimally important difference*[tw] OR minimally clinical important difference*[tw] OR minimum clinically important change*[tw] OR minimum clinical important change* [tw] OR minimum important change*[tw] OR minimal clinically important change*[tw] OR minimal clinical important change* [tw] OR minimally important change*[tw] OR minimally clinically important change*[tw] OR minimally clinical important change* [tw] OR minimum clinically important improvement*[tw] OR minimum clinical important improvement* [tw] or minimum important improvement* [tw] OR minimal clinically important improvement*[tw] OR minimal clinical important improvement* [tw] or minimal important improvement* [tw] OR minimally clinical important improvement*[tw] OR minimally clinically important improvement*[tw] OR minimally important improvement*[tw] OR clinically meaningful difference*[tw] OR clinically meaningful change*[tw] OR clinically meaningful improvement*[tw] OR clinical meaningful difference*[tw] OR clinical meaningful change* [tw] OR clinical meaningful improvement* [tw]</p> | <p>Initial search on the 9<sup>th</sup> of June 2015.</p> <p>Updated on the 28<sup>th</sup> of January 2016 and the 13<sup>th</sup> of June 2017</p>  |
| EMBASE   | <p>P - Concept Patients with COPD</p> <p>'obstructive airway disease'/exp OR 'chronic obstructive lung disease'/exp OR 'COPD':ab,ti OR 'Chronic Obstructive Pulmonary Disease':ab,ti OR 'Obstructive Pulmonary Disease':ab,ti OR 'Pulmonary Disease':ab,ti OR 'Chronic Obstructive Airway Disease':ab,ti OR 'Obstructive Airway Disease':ab,ti OR 'Airflow Limitation':ab,ti OR 'Airflow Obstruction':ab,ti OR 'Chronic Bronchitis':ab,ti OR 'Bronchitis':ab,ti OR 'Emphysema':ab,ti OR 'Chronic Airway Disease':ab,ti OR 'Respiratory Disease':ab,ti OR 'Chronic Obstructive Pulmonary Diseases':ab,ti OR 'Obstructive Pulmonary Diseases':ab,ti OR 'Pulmonary Diseases':ab,ti OR 'Chronic Obstructive Airway Diseases':ab,ti OR 'Obstructive Airway Diseases':ab,ti OR 'Airflow Limitations':ab,ti OR 'Airflow Obstructions':ab,ti OR 'Chronic Airway Diseases':ab,ti OR 'Respiratory Diseases':ab,ti OR 'Chronic Obstructive Pulmonary Disorder':ab,ti OR 'Obstructive Pulmonary Disorder':ab,ti OR 'Pulmonary Disorder':ab,ti OR 'Chronic Obstructive Airway Disorder':ab,ti OR 'Obstructive Airway Disorder':ab,ti OR 'Chronic Airway Disorder':ab,ti OR 'Respiratory Disorder':ab,ti OR 'Chronic Obstructive Pulmonary Disorders':ab,ti OR 'Obstructive Pulmonary Disorders':ab,ti OR 'Pulmonary Disorders':ab,ti OR 'Chronic Obstructive Airway Disorders':ab,ti OR 'Obstructive Airway Disorders':ab,ti OR 'Chronic Airway Disorders':ab,ti OR 'Respiratory Disorders':ab,ti</p> <p>AND</p> <p>I - Concept Patient reported health status questionnaires</p> <p>'general health status assessment'/exp OR 'health status'/exp OR 'health status indicator'/exp OR 'quality of life'/exp OR 'quality of life assessment'/exp OR 'Patient Health Questionnaire'/exp OR 'questionnaire'/exp OR 'Patient-reported outcome':ab,ti OR 'Patient Reported Outcome':ab,ti OR 'PRO':ab,ti OR 'Health Status':ab,ti OR 'Quality Of Life':ab,ti or 'QoL':ab,ti OR 'Questionnaire':ab,ti OR 'Patient-reported outcomes':ab,ti OR 'Patient Reported Outcomes':ab,ti OR 'Questionnaires':ab,ti</p> <p>AND</p> <p>C - none</p>                                                                                                                                                                                                                              | <p>Initial search on the 15<sup>th</sup> of June 2015.</p> <p>Updated on the 28<sup>th</sup> of January 2016 and the 13<sup>th</sup> of June 2017</p> |

|                  |                                                                                                                                                                                                                                                                                                                                                                                                                                                                                                                                                                                                                                                                                                                                                                                                                                                                                                                                                                                                                                                                                                                                                                                                                                                                                                                                                                                                                                                                                                                                                                                                                                                                                                                                                                                                                                                                                                                                                                                                                                                                                                                                                                                                                                                                                                                                                                                                                                                                                                                                                                                                                                                                                                                                                                                                                                                                                                                                                                                                                                                                                         |                                                                                                                                                      |
|------------------|-----------------------------------------------------------------------------------------------------------------------------------------------------------------------------------------------------------------------------------------------------------------------------------------------------------------------------------------------------------------------------------------------------------------------------------------------------------------------------------------------------------------------------------------------------------------------------------------------------------------------------------------------------------------------------------------------------------------------------------------------------------------------------------------------------------------------------------------------------------------------------------------------------------------------------------------------------------------------------------------------------------------------------------------------------------------------------------------------------------------------------------------------------------------------------------------------------------------------------------------------------------------------------------------------------------------------------------------------------------------------------------------------------------------------------------------------------------------------------------------------------------------------------------------------------------------------------------------------------------------------------------------------------------------------------------------------------------------------------------------------------------------------------------------------------------------------------------------------------------------------------------------------------------------------------------------------------------------------------------------------------------------------------------------------------------------------------------------------------------------------------------------------------------------------------------------------------------------------------------------------------------------------------------------------------------------------------------------------------------------------------------------------------------------------------------------------------------------------------------------------------------------------------------------------------------------------------------------------------------------------------------------------------------------------------------------------------------------------------------------------------------------------------------------------------------------------------------------------------------------------------------------------------------------------------------------------------------------------------------------------------------------------------------------------------------------------------------------|------------------------------------------------------------------------------------------------------------------------------------------------------|
|                  | <p>AND</p> <p>O – Minimal Clinically Important Difference (MCID)</p> <p>'MCID':ab,ti OR 'MID':ab,ti OR 'minimum clinically important difference':ab,ti OR 'minimum clinical important difference':ab,ti OR 'minimum important difference':ab,ti OR 'minimal clinically important difference':ab,ti OR 'minimal clinical important difference':ab,ti OR 'minimal important difference':ab,ti OR 'minimally important difference':ab,ti OR 'minimally clinically important difference':ab,ti OR 'minimally clinically important change':ab,ti OR 'minimum clinically important change':ab,ti OR 'minimum important change':ab,ti OR 'minimal clinically important change':ab,ti OR 'minimal clinical important change':ab,ti OR 'minimally important change':ab,ti OR 'minimally clinically important change':ab,ti OR 'minimally clinical important change':ab,ti OR 'minimum clinically important improvement':ab,ti OR 'minimum clinical important improvement':ab,ti OR 'minimum important improvement':ab,ti OR 'minimal clinically important improvement':ab,ti OR 'minimal clinical important improvement':ab,ti OR 'minimal important improvement':ab,ti OR 'minimally clinical important improvement':ab,ti OR 'minimally clinically important improvement':ab,ti OR 'minimally important improvement':ab,ti OR 'clinically meaningful difference':ab,ti OR 'clinically meaningful change':ab,ti OR 'clinically meaningful improvement':ab,ti OR 'clinical meaningful difference':ab,ti OR 'clinical meaningful change':ab,ti OR 'clinical meaningful improvement':ab,ti OR 'minimum clinically important differences':ab,ti OR 'minimum clinical important differences':ab,ti OR 'minimum important differences':ab,ti OR 'minimal clinically important differences':ab,ti OR 'minimal clinical important differences':ab,ti OR 'minimal important differences':ab,ti OR 'minimally important differences':ab,ti OR 'minimally clinically important differences':ab,ti OR 'minimally clinically important changes':ab,ti OR 'minimum clinically important changes':ab,ti OR 'minimum important changes':ab,ti OR 'minimal clinically important changes':ab,ti OR 'minimal clinical important changes':ab,ti OR 'minimally important changes':ab,ti OR 'minimally clinically important changes':ab,ti OR 'minimally clinical important changes':ab,ti OR 'minimum clinically important improvements':ab,ti OR 'minimum clinical important improvements':ab,ti OR 'minimum important improvements':ab,ti OR 'minimal clinically important improvements':ab,ti OR 'minimal clinical important improvements':ab,ti OR 'minimally clinical important improvements':ab,ti OR 'minimally important improvements':ab,ti OR 'clinically meaningful differences':ab,ti OR 'clinically meaningful changes':ab,ti OR 'clinically meaningful improvements':ab,ti OR 'clinical meaningful differences':ab,ti OR 'clinical meaningful changes':ab,ti OR 'clinical meaningful improvements':ab,ti</p> <p>AND [embase]/lim</p> <p>Conference abstracts were excluded using the filter option</p> |                                                                                                                                                      |
| COCHRANE LIBRARY | <p>#1 MeSH descriptor: [Pulmonary Disease, Chronic Obstructive] explode all trees</p> <p>#2 COPD or "Chronic Obstructive Pulmonary Dis*" or "Obstructive Pulmonary Dis*" or "Pulmonary Dis*" or "Chronic Obstructive Airway Dis*" or "Obstructive Airway Dis*" or "Airflow Limitation*" or "Airflow Obstruction*" or "Chronic Bronchitis" or Bronchitis or Emphysema or "Chronic Airway Dis*" or "Respiratory Dis*":ti,ab,kw (Word variations have been searched)</p> <p>#3 MeSH descriptor: [Health Status] explode all trees</p> <p>#4 MeSH descriptor: [Health Status Indicators] explode all trees</p> <p>#5 MeSH descriptor: [Quality of Life] explode all trees</p> <p>#6 MeSH descriptor: [Questionnaires] explode all trees</p> <p>#7 "Patient-reported outcome*" or "Patient Reported Outcome*" or PRO or "health status" or "Quality of Life" or QoL or Questionnaire*:ti,ab,kw (Word variations have been searched)</p> <p>#8 MCID or MID or "minimum clinically important difference*" or "minimum clinical important difference*" or "minimum important difference*" or "minimal clinically important difference*" or "minimal clinical important difference*" or "minimal important difference*" or "minimally important difference*" or "minimally clinical important difference*" or "minimally clinically important difference*" or "minimum clinically important change*" or "minimum clinical important change*" or "minimum important change*" or "minimal clinically important change*" or "minimal clinical important change*" or "minimally important change*" or "minimally clinically important change*" or "minimally clinical important change*" or "minimum clinically important improvement*" or "minimum clinical important improvement*" or "minimum important improvement*" or "minimal clinically important improvement*" or "minimal clinical important improvement*" or "minimally clinical important improvement*" or "minimally important improvement*" or "clinically meaningful difference*" or "clinically meaningful change*" or "clinically meaningful improvement*" or "clinical meaningful difference*" or "clinical meaningful change*" or "clinical meaningful improvement*":ti,ab,kw (Word variations have been searched)</p> <p>#9 (#1 OR #2) AND (#3 OR #4 OR #5 OR #6 OR #7) AND #8</p> <p>Option trials was selected</p>                                                                                                                                                                                                                                                                                                                                                                                                                                                                                                                                                                                                                                                                                                             | <p>Initial search on the 9<sup>th</sup> of July 2015.</p> <p>Updated on the 28<sup>th</sup> of January 2016 and the 16<sup>th</sup> of June 2017</p> |

*Supplementary Table S2: Risk of bias and quality assessment form*

| <b>Selected item</b>                                                                        | <b>Scoring method (points)</b>                       |
|---------------------------------------------------------------------------------------------|------------------------------------------------------|
| 1. Were participant inclusion criteria clearly defined?                                     | Yes (2) No (0) Unclear (1)                           |
| 2. Were participant exclusion criteria clearly defined?                                     | Yes (2) No (0) Unclear (1)                           |
| 3. Were patients systematically enrolled?                                                   | Yes (2) No (0) Unclear (1)                           |
| 4. Was follow-up completed?                                                                 | Yes (2) No (0) Unclear (1)                           |
| 5. Were missing data procedures reported?                                                   | Yes (2) No (0) Unclear (1)                           |
| 6. Which % lost in follow up?                                                               | <25% (2) ≥25% (0) Unclear (1)                        |
| 7. Were at least two health status measurements (pre and post) available?                   | Yes (2) No (0) Unclear (1)                           |
| 8. Was the time interval for follow-up stated?                                              | Yes (2) No (0) Unclear (1)                           |
| 9. Were test conditions similar for both measurements?                                      | Yes (2) No (0) Unclear (1)                           |
| 10. Was there an adequate description given of measurement instrument?                      | Yes (2) No (0) Unclear (1)                           |
| 11. Was the instrument validated in the current study, or is made reference to other study? | Yes (2) No (0) Unclear (1)                           |
| 12. Were floor effects described                                                            | Yes (2) No (0) Unclear (1)                           |
| 13. Were ceiling effects described                                                          | Yes (2) No (0) Unclear (1)                           |
| 14. Was the M(C)ID or MIC calculated?                                                       | Yes (2) No (0) Unclear (1)                           |
| 15. Was an adequate description given of the anchor(s)?                                     | Yes (2) No (0) Unclear (1) Not Applicable = N/A (0)  |
| 16. Were measurement properties of the anchor(s) described?                                 | Yes (2) No (0) Unclear (1) Not Applicable = N/A (0)  |
| 17. Can the anchor(s) be considered a gold standard?                                        | Yes (2) No (0) Unclear (1) Not Applicable = N/A (0)  |
| 18. Were >1 anchor used to determine M(C)ID?                                                | Yes (2) No (0) Unclear (1) Not Applicable = N/A (0)  |
| 19. Were anchor correlations calculated?                                                    | Yes (2) No (0) Unclear (1) Not Applicable = N/A (0)  |
| 20. Were anchor correlations ≥0.50?                                                         | Yes (2) No (0) Unclear (1) Not Applicable = N/A (0)  |
| 21. Were ROC curves produced?                                                               | Yes (2) No (0) Unclear (1) Not Applicable = N/A (0)  |
| 22. Was the Area Under the Curve (AUC) ≥0.70?                                               | Yes (2) No (0) Unclear (1) Not Applicable = N/A (0)  |
| 23. Was a Global Rating of Change used?                                                     | Yes (2) No (0) Unclear (1) Not Applicable = N/A (0)  |
| 24. Number of GRC anchor questions?                                                         | <11 (0) ≥11 (2) Unclear (1) Not Applicable = N/A (0) |

|                                                       |                                                                                      |
|-------------------------------------------------------|--------------------------------------------------------------------------------------|
| 25. What criterion was used?                          | Exacerbation (2) Hospital admission (1) Death (0) Other (1) Not Applicable = N/A (0) |
| 26. Was more than one distribution-based method used? | Yes (2) No (0) Unclear (1) Not Applicable = N/A (0)                                  |
| 27. Was more than one population used in MCID?        | Yes (2) No (0) Unclear (1)                                                           |
| 28. MCID calculated for:                              | Improvement (1) Deterioration (1) Both (2)                                           |
| 29. Was there selective outcome reporting?            | Yes (0) No (2) Unclear (1)                                                           |
| 30. Was there funding bias?                           | Yes (0) No (2) Unclear (1)                                                           |
| 31. Was there ownership bias?                         | Yes (0) No (2) Unclear (1)                                                           |

## **CAT**

The CAT contains eight questions with item scores ranging zero (no limitations) up to five (maximum limitations) [90]. The total score derives from summing all items (min:0, max:40).

## **CCQ**

The CCQ contains ten questions with item scores ranging zero (no limitations) to six (maximum limitations) [91]. Total and domain scores (symptoms, functional and mental status) result from summing relevant scores and dividing this by the number of items (min: 0, max: 6).

## **(SF-)CRQ**

The CRQ consists of 20 items scored on a seven-point scale ranging one (most troubles) to seven (no troubles) on the domains dyspnea (five items), fatigue (four items), emotional function (seven items), and mastery (four items) [92]. Domain scores are determined by summing the scores or determining the mean of the summed items. [7, 80, 88]. The SF-CRQ includes two selected items per domain [71].

## **The eDiary**

The eDiary contains five symptom items and two impact items, resulting in scores ranging from zero (best possible state/no problems) to 10 (worst possible state) [77].

## **EQ-5D Utilities Index and VAS**

The EQ-5D contains the five dimensions mobility, self-care, usual activities, pain/discomfort, and anxiety/depression with each three (EQ-5D-3L) or five levels (EQ-5D-5L) in scoring severity [93-94]. A scoring algorithm results in an Utility Index (UI) between -0.590 (worst health) and +1.000 (best health) for the 3L version; and -0.208 to +1.000 for the 5L version. In addition, a Visual Analogue Scale (VAS) score must be marked from zero (worst health) to 100 (best health).

## **Feeling Thermometer (FT)**

The FT is a VAS ranging from zero (worst state) to 100 (best score) [81].



### **Quality of Life for Respiratory Illness Questionnaire (QOLRIQ)**

The QOLRIQ contains 55 items regarding breathing problems, physical problems, emotions, situations triggering or enhancing breathing problems, general activities, daily and domestic activities, and social activities, relationships and sexuality [84]. Scores range on a seven-point scale with higher scores representing more impairment.

### **SF-6D and SF-36**

The SF-36 contains 36 items divided over eight domains each scoring between zero (worst health) and 100 (best health) [95]. The SF-6D includes six dimensions resulting in a health state ranging 0.29 (worst health) to 1.00 (full health) [85].

### **St. George's Respiratory Questionnaire (SGRQ)**

The SGRQ is a 50-item questionnaire containing the domains symptoms, activities and impact with total and domain scores ranging zero (best health status) to 100 (worst health status) [96].

### **Visual Simplified Respiratory Questionnaire (VSRQ)**

The VSRQ contains eight items covering dyspnea, anxiety, depression, sleep, energy, daily activities, social activities, and sexual life [79]. Scores range from zero to ten with lower scores indicating higher impact on patients' HRQoL.

*Supplementary Table S3: Overview of excluded studies during the full-text analysis stage in alphabetical order*

| <b>Title:</b>                                                                                                                                               | <b>Author(s):</b>                                                            | <b>Journal and year:</b>                                                      | <b>Reason for exclusion:</b>                |
|-------------------------------------------------------------------------------------------------------------------------------------------------------------|------------------------------------------------------------------------------|-------------------------------------------------------------------------------|---------------------------------------------|
| A comparison between the EQ-5D and the SF-6D in patients with Chronic Obstructive Pulmonary Disease (COPD)                                                  | J. Chen; C.K.H. Wong; S.M. McGhee; P.K.P. Pang; Wai-Cho Yu                   | PLOS one 2014; 9: 11                                                          | No MCID calculations.                       |
| A comparison of clinically important differences in health-related quality of life for patients with chronic lung disease, asthma, or heart disease.        | K.W. Wyrwich; W.M. Tierney; A.N. Babu; K. Kroenke; F.D. Wolinsky             | Health Services Research 2005; 40: 2                                          | No clinical data.                           |
| A measure of quality of life for clinical trials in chronic lung disease                                                                                    | G.H. Guyatt; L.B. Berman; M. Townsend; S.O. Pugsley; L.W. Chambers           | Thorax 1987; 42: 773-778                                                      | No MCID calculations.                       |
| Analysis of the factors related to mortality in chronic obstructive pulmonary disease                                                                       | T. Oga, K. Nishimura, M. Tsukino, S. Sato, T. Hajiro                         | American Journal of Respiratory and Critical Care Medicine 2002; 167: 544-549 | No MCID calculations.                       |
| A systematic overview of the measurement properties of the chronic respiratory questionnaire                                                                | Y. Lacasse; E Wong; G. Guyatt                                                | Canadian Respiratory Journal 1997; 4: 3                                       | No original data.                           |
| Bridging the gap: Using triangulation methodology to estimate Minimal Clinically Important Differences (MCIDs)                                              | N. Kline Leidy; K.W. Wyrwich                                                 | COPD: Journal of Chronic Obstructive Pulmonary Disease 2005; 2: 157-165       | No original data.<br>No health status tool. |
| Clinically important changes in health-related quality of life for patients with chronic obstructive pulmonary disease: an expert consensus panel report.   | K.W. Wyrwich; S.D. Fihn; W.M. Tierney; K. Kroenke; A.N. Babu; F.D. Wollinsky | Journal of General Internal Medicine Volume 2003; 18                          | No clinical data.                           |
| Creating scenarios of the impact of COPD and their relationship to COPD assessment test (CAT) scores                                                        | P.W. Jones; M. Tabberer; W-H Chen                                            | BMC Pulmonary Medicine 2011; 11: 42                                           | No MCID calculations.                       |
| Development and first validation of the COPD Assessment Test                                                                                                | P.W. Jones, G. Harding, P. Berry, et al.                                     | European Respiratory Journal 2009; 34: 648-654                                | No MCID calculations.                       |
| EQ-5D-derived health utilities and minimally important differences for chronic health conditions: 2011 Commonwealth Fund Survey of Sicker Adults in Canada. | K. Tsiplava, E. Pullenayegum, T. Cooke, F. Xie                               | Quality of Life Research 2016; 25: 3009-3016                                  | COPD combined with asthma.                  |
| Estimation and application of the minimum clinically important difference in COPD                                                                           | P.W. Jones                                                                   | The Lancet Respiratory Medicine 2014; 2                                       | No original data.                           |
| Evaluating the Clinical COPD Questionnaire: A systematic review.                                                                                            | Z. Zhou, A. Zhou, Y. Zhao, P. Chen                                           | Respirology 2017; 22: 251-262                                                 | No original data.                           |
| Examining the Minimal Clinically Important Difference in the St. George's Respiratory Questionnaire                                                         | M. Decramer; B. Celli; D.P. Tashkin; D. Liu; S. Kesten                       | American Journal of Respiratory and Critical Care Medicine 2011; 183: A1514   | No full text available.                     |

|                                                                                                                                                            |                                                                                                        |                                                                               |                                            |
|------------------------------------------------------------------------------------------------------------------------------------------------------------|--------------------------------------------------------------------------------------------------------|-------------------------------------------------------------------------------|--------------------------------------------|
| Factors associated with the minimal clinically important difference for health-related quality of life after physical conditioning in patients with COPD   | V.Z. Dourado; C. de Oliveira Antunes; S.E. Tanni; I. Godoy                                             | Journal of Brazilian Pneumology 2009; 35(9): 846-853                          | No MCID calculations.                      |
| Further evidence supporting an SEM-based criterion for identifying meaningful intra-individual changes in health-related quality of life                   | K.W. Wyrwich; W.M. Tierney; F.D. Wolinsky                                                              | Journal of Clinical Epidemiology 1999; 52 (9): 861-873                        | No MCID calculations.                      |
| Half standard deviation estimate of the minimally important difference in HRQOL scores?                                                                    | S.S. Farivar; H. Liu; R.D. Hays                                                                        | Expert Review Pharmacoeconomics Outcomes Research 2004; 4(5)                  | No original data.                          |
| Health-related quality of life and mortality in male patients with chronic obstructive pulmonary disease.                                                  | A. Domingo-Salvany, R. Lamarca, M. Ferrer, J. Garcia-Aymerich, J. Alonso, M. Felez, A. Khalaf Marrades | American Journal of Respiratory and Critical Care Medicine 2002; 166: 680-685 | No MCID calculations.                      |
| How can we assess outcomes of clinical trials: The MCID approach                                                                                           | B. Make                                                                                                | COPD: Journal of Chronic Obstructive Pulmonary Disease 2007; 4: 191-194       | No original data.                          |
| Improving the interpretation of quality of life evidence in meta-analyses: the application of minimal important difference units                           | B.C. Johnston; K. Thorlund; H.J. Schünemann; F. Xie; M. Hassan Murad; V.M. Monton; G.H. Guyatt         | Health and Quality of Life Outcomes 2010; 8: 116                              | No original data.<br>No MCID calculations. |
| Interpretation of changes in health-related quality of life: the remarkable universality of half a standard deviation                                      | G.R. Norman; J.A. Sloan; K. Wyrwich                                                                    | Medical Care 2003; 41 (5): 585-592                                            | No original data.                          |
| Interpretation of changes in HRQL outcomes: The relationship between distribution- and anchor-based approaches                                             | G.R. Norman; C.R. Dennison                                                                             | European Respiratory Review 2002                                              | No full text available.                    |
| Interpreting results from clinical trials: Understanding Minimal Clinically Important Differences in COPD outcomes                                         | B. Make; R. Casaburi; N. Kline Leidy                                                                   | COPD: Journal of Chronic Obstructive Pulmonary Disease 2005; 2: 1-5           | No original data.                          |
| Interpreting score differences in the SF-36 Vitality scale: using clinical conditions and functional outcomes to define the minimally important difference | J.B. Bjorner; G.V. Wallenstein; M.C. Martin; P. Lin; B. Blaisdell-Gross; C. Tak Piech; S.H. Mody       | Current Medical Research and Opinions 2007; 23(4): 731-739                    | No MCID calculations.                      |
| Interpreting thresholds for a clinically significant change in health status in asthma and COPD                                                            | P.W. Jones                                                                                             | European Respiratory Journal 2002; 19: 398-404                                | No original data.                          |
| Limitations of calculating “true” regression slope: impact on estimates of minimal important difference                                                    | J.W. Dodd, P.W. Jones                                                                                  | European Respiratory Journal 2011; 37: 1296-1301                              | No original data.                          |
| Linking clinical relevance and statistical significance in evaluating intra-individual changes in health-related quality of life                           | K.W. Wyrwich; N.A. Nienaber; W.M. Tierney; F.D. Wolinsky                                               | Medical Care 1999; 37 (5): 469-478                                            | No original data.<br>No COPD.              |

|                                                                                                                                          |                                                                                                                                                |                                                                                 |                                             |
|------------------------------------------------------------------------------------------------------------------------------------------|------------------------------------------------------------------------------------------------------------------------------------------------|---------------------------------------------------------------------------------|---------------------------------------------|
| Meaningful effect size and patterns of response of the transition dyspnea index                                                          | T.J. Witek Jr.; D.A. Mahler                                                                                                                    | Journal of Clinical Epidemiology 2003; 56(3): 248-55                            | No health status tool.                      |
| Measurement properties and interpretability of the Chronic Respiratory Disease Questionnaire (CRQ)                                       | H.J. Schünemann; M. Puhan; R. Goldstein; R. Jaeschke; G.H. Guyatt                                                                              | COPD: Journal of Chronic Obstructive Pulmonary Disease 2005; 2: 81-89           | No original data.                           |
| Measures of dyspnea in pulmonary rehabilitation                                                                                          | E. Crisafulli; E.M. Clini                                                                                                                      | Multidisciplinary Respiratory Medicine 2010; 5(3): 202-210                      | No original data.                           |
| Minimally Clinically Important Difference for the UCSD Shortness of Breath Questionnaire, Borg Scale, and Visual Analog Scale            | A.L. Ries                                                                                                                                      | COPD: Journal of Chronic Obstructive Pulmonary Disease 2005; 2: 105-110         | No original data.<br>No health status tool. |
| Minimal Clinically Important Differences in Pharmacological Trials                                                                       | P.W. Jones; K.M. Beeh; K.R. Chapman; M. Decramer; D.A. Mahler; J.A. Wedzicha                                                                   | American Journal of Respiratory and Critical Care Medicine 2014; 189 (3)        | No original data.                           |
| Minimal Clinically Important Differences (MCIDs) of the Thai Version of the Leicester Cough Questionnaire for Subacute and Chronic Cough | P. Pornsuriyasak, P. Thungtitigul, T. Kawamatawong, S.S. Birring, T. Pongmesa                                                                  | Value in Health Regional Issues 2017; 12C: 57-62                                | No COPD                                     |
| Minimal important difference of the transition dyspnea index in a multinational clinical trial                                           | T.J. Witek Jr.; D.A. Mahler                                                                                                                    | European Respiratory Journal 2003; 21: 267-272                                  | No health status tool.                      |
| Minimal Important Difference thresholds and the Standard Error of Measurement: Is there a connection?                                    | K.W. Wyrwich                                                                                                                                   | Journal of Biopharmaceutical Statistics 2004; 14(1): 97-110                     | No original data.                           |
| New methods can extend the use of minimal important difference units in meta-analyses of continuous outcome measures                     | B.C. Johnston; K. Thorlund; B.R. da Costa; T.A. Furukawa; G.H. Guyatt                                                                          | Journal of Clinical Epidemiology 2012; 65: 817-826                              | No original data.                           |
| Power of outcome measurements to detect clinically significant changes in pulmonary rehabilitation of patients with COPD.                | J.P. de Torres; V. Pinto-Plata; E. Ingenito; P. Bagley; A. Gray; R. Berger; B. Celli                                                           | Chest 2002; 121: 4                                                              | No MCID calculations.                       |
| Properties of the COPD assessment test in a cross-sectional European Study                                                               | P.W. Jones; G. Bruselle; R.W. Dal Negro; M. Ferrer; P. Kardos; M.L. Levy; T. Perez; J.J. Soler Cataluna; T. van der Molen; L. Adamek; N. Banik | European Respiratory Journal 2001; 38: 29-35                                    | No MCID calculations.                       |
| Quality of life and hospital readmission in patients with chronic obstructive pulmonary disease                                          | L.M. Osman; D.J. Godden; J.A.R. Friend; J.S. Legge; J.G. Douglas                                                                               | Thorax 1997; 52: 67-71                                                          | No MCID calculations.                       |
| Quality of life changes in COPD patients treated with Salmeterol                                                                         | P.W. Jones; T.K. Bosh                                                                                                                          | American Journal of Respiratory and Critical Care Medicine 1997; 155: 1283-1289 | No MCID calculations.                       |

|                                                                                                                                                                                                  |                                                                                                                               |                                                                                 |                                             |
|--------------------------------------------------------------------------------------------------------------------------------------------------------------------------------------------------|-------------------------------------------------------------------------------------------------------------------------------|---------------------------------------------------------------------------------|---------------------------------------------|
| Quality of life in patients with chronic respiratory disease: the Spanish version of the chronic respiratory questionnaire                                                                       | R. Guell; P. Casan; M. Sengenis; F. Morante; J. Belda; G.H. Guyatt                                                            | European Respiratory Journal 1998; 11: 55-60                                    | No MCID calculations.                       |
| Quality of life, symptoms and pulmonary function in asthma: long-term treatment with nedocromil sodium examined in a controlled multicentre trial. Nedocromil Sodium Quality of Life Study Group | P.W. Jones and the Nedocromil Sodium Quality of Life Study Group                                                              | European Respiratory Journal 1994; 7: 55-62                                     | No MCID calculations.<br>No COPD            |
| Relation of distribution- and anchor-based approaches in interpretation of changes in Health Related Quality of Life                                                                             | G.R. Norman; F. G. Sridhar; G.H. Guyatt; S.D. Walter                                                                          | Medical Care 2001; 39(10): 1039-47                                              | No original data.                           |
| Responsiveness of the COPD Assessment Test: The Minimal Clinically Important Difference does matter                                                                                              | J.W.H. Kocks; I.G. Tsiligianni; T. van der Molen                                                                              | Chest 2012; 142: 1                                                              | No original data.                           |
| Self-complete measure of health status for chronic airflow limitation. The St. George's Respiratory Questionnaire                                                                                | P.W. Jones; F.H. Quirk; C.M. Baveystock; P.A. Littlejohns                                                                     | American Journal of Respiratory and Critical Care Medicine 1992; 145(6): 1321-7 | No MCID calculations.                       |
| Statistical interpretations of health-related quality of life outcomes in COPD: Alternatives to the MCID                                                                                         | G.R. Norman                                                                                                                   | European Respiratory Review 2002                                                | No full text available.                     |
| Statistical interpretation of HRQL changes in COPD: Development of the MCID standards and related                                                                                                | K.W. Wyrwich                                                                                                                  | European Respiratory Review 2002                                                | No full text available.                     |
| St. George's Respiratory Questionnaire: MCID                                                                                                                                                     | P.W. Jones                                                                                                                    | COPD: Journal of Chronic Obstructive Pulmonary Disease 2005; 2: 75-79           | No original data.                           |
| Small, moderate, and large changes, and the Minimum Clinically Important Difference in the University of California, San Diego Shortness of Breath Questionnaire                                 | N. Horita; N. Miyazawa; S. Morita; R. Kojima; N. Kimura; T. Kaneko; Y. Ishigatsubo                                            | COPD: Journal of Chronic Obstructive Pulmonary Disease 2014; 11: 26-32          | No health status tool.                      |
| The COPD assessment test: a systematic review                                                                                                                                                    | N. Gupta; L.M. Pino; A. Morogan; J. Bourbeau                                                                                  | European Respiratory Journal 2014; 44: 873-884                                  | No original data.                           |
| The Minimal Clinically Important Difference in Generic Utility-Based Measures                                                                                                                    | R.M. Kaplan                                                                                                                   | COPD: Journal of Chronic Obstructive Pulmonary Disease 2005; 2: 91-97           | No health status tool.<br>No original data. |
| The minimal detectable change cannot reliably replace the minimal important difference.                                                                                                          | D. Turner; H.J. Schünemann; L.E. Griffith; D.E. Beaton; A.M. Griffiths                                                        | Journal of Clinical Epidemiology 2010; 63: 28-36                                | No original data.                           |
| The minimal important difference of the hospital anxiety and depression scale in patients with chronic obstructive pulmonary disease                                                             | M.A. Puhan; M. Frey; S. Büchi; H.J. Schünemann                                                                                | Health and Quality of Life Outcomes 2008; 6: 46                                 | No health status tool.                      |
| The minimal important difference of the pulmonary functional status and dyspnea questionnaire in patients with severe chronic obstructive pulmonary disease                                      | E.M.G. Regueiro; C. Burtin; P. Baten; D. Langer; H. Van Remoortel; V.A. Pires Di Lorenzo; D. Costa; W. Janssens; M. Decramer; | Respiratory Research 2013; 4: 58                                                | No health status tool.                      |

|                                                                                                               |                                                                                                        |                                                     |                        |
|---------------------------------------------------------------------------------------------------------------|--------------------------------------------------------------------------------------------------------|-----------------------------------------------------|------------------------|
|                                                                                                               | R. Gosselink; T. Troosters                                                                             |                                                     |                        |
| The precision of health state valuation by members of the general public using the standard gamble            | K. Stein; M. Dyer; R. Milne; A. Round; K. Ratcliffe; J. Brazier                                        | Quality of Life Research 2009; 18: 509-518          | No health status tool. |
| The responsiveness of the Anxiety Inventory for Respiratory Disease Scale following Pulmonary Rehabilitation. | A.M. Yohannes, S. Dryden, N.A. Hanania                                                                 | Chest 2016; 150(1): 188-195                         | No health status tool. |
| The St George's Respiratory Questionnaire                                                                     | P.W. Jones; F.H. Quirk; C.M. Baveystock                                                                | Respiratory Medicine 1991, 85 (Supplement B): 25-31 | No MCID calculations.  |
| Trial end-point in Chronic Obstructive Pulmonary Disease (COPD): Minimal Clinically Important Difference      | A. Gillissen; R. Buhl; P. Kardos; M. Puhan; K.F. Rabe; T. Rothe; R. Sauer; T. Welte; H. Worth; G. Menz | Pneumologie 2008; 62: 149-157                       | No original data.      |

Supplementary Table S4: Patient characteristics and health status scores of the included studies

| First author(s):                                                 | Male (%): | Age:           | Spirometry (FEV1%pred):                 | Baseline health status:                                                                                   | Health status change score:                                                                                   |
|------------------------------------------------------------------|-----------|----------------|-----------------------------------------|-----------------------------------------------------------------------------------------------------------|---------------------------------------------------------------------------------------------------------------|
| <b>COPD Assessment Test (CAT)</b>                                |           |                |                                         |                                                                                                           |                                                                                                               |
| Alma [70]                                                        | 65        | 57.87±6.56     | 50.4±15.11                              | 20.23±7.33                                                                                                | -3.11±5.59                                                                                                    |
| Dodd [72]                                                        | 62.7      | 69.2±9.3       | 50.9±18.9                               | 20.5±7.4                                                                                                  | -2.9±5.6                                                                                                      |
| Jones study 1 [73]                                               | 49        | 64±9           | 47±21                                   | 21.44±7.7                                                                                                 | -1.4±5.3                                                                                                      |
| Jones study 2 [73]                                               | 61        | 67±8           | 50±17                                   | 17.9±6.5                                                                                                  | -2.2±5.3                                                                                                      |
| Kon study 1 [75]                                                 | 58        | 70±9           | 47.6 (CI 45.9-49.3)                     | 21.4 (CI 20.8-22.0)                                                                                       | -2.5 (CI -3.0 - to -1.9)                                                                                      |
| Kon study 2 [75]                                                 | 60        | 71±11          | 42 (CI 39-46)                           | 23.5 (CI 22.3-24.8)                                                                                       | -3.0 (-4.4 to -1.6)                                                                                           |
| Kon study 3 [75]                                                 | NR        | 70±8           | 47.6 (CI 44.4-50.8)                     | 20.1 (CI 19.1-21.2)                                                                                       | 0.6 (-0.4 to 1.5)                                                                                             |
| Smid [82]                                                        | 55.4      | 64.3±8.8       | 48.9±20                                 | 21.5±6.6                                                                                                  | -3.0±6.8                                                                                                      |
| Tsiligianni [83]                                                 | 90        | 67 (IQR 58-75) | GOLD I/II/III/IV %:<br>16.7/46.7/30/0.7 | NR                                                                                                        | NR                                                                                                            |
| <b>Clinical COPD Questionnaire (CCQ)</b>                         |           |                |                                         |                                                                                                           |                                                                                                               |
| Alma [70]                                                        | 65        | 57.87±6.56     | 50.4±15.11                              | 2.86±1.17 (CCQ total)<br>2.87±1.24 (CCQ symptoms)<br>2.86±1.34 (CCQ functional)<br>2.86±1.74 (CCQ mental) | -0.58±0.92 (CCQ total)<br>-0.59±1.16 (CCQ symptoms)<br>-0.56±1.00 (CCQ functional)<br>-0.62±1.49 (CCQ mental) |
| Kocks [74]                                                       | NR        | 71 (IQR 43-84) | 37.7                                    | NR                                                                                                        | NR                                                                                                            |
| Kon [76]                                                         | 57.9      | 71 (CI 70-72)  | 49.8 (CI 47.3-52.3)                     | 2.8 (CI 2.6-2.9)                                                                                          | -0.5 (CI -0.6 to -0.3)                                                                                        |
| Smid [82]                                                        | 55.4      | 64.3±8.8       | 48.9±20                                 | 2.6±1.0                                                                                                   | -0.6±0.9                                                                                                      |
| Tsiligianni [83]                                                 | 90        | 67 (IQR 58-75) | GOLD I/II/III/IV %:<br>16.7/46.7/30/0.7 | NR                                                                                                        | NR                                                                                                            |
| <b>(Short-Form) Chronic Respiratory Questionnaire ((SF-)CRQ)</b> |           |                |                                         |                                                                                                           |                                                                                                               |
| Chu-Lin Tsai [71] – SF-CRQ                                       | 45        | 69 (IQR 62-75) | NR                                      | 3 (IQR 2-4) dyspnea<br>2 (IQR 1.5-3.5) fatigue<br>3.5 (IQR 2.5-5) emotional<br>3.5 (IQR 2.5-4.5) mastery  | 2 (IQR 0.5-3.5) dyspnea<br>1 (IQR 0-2.5) fatigue<br>1 (IQR 0-2.5) emotional<br>1.5 (IQR 0-3) mastery          |
| Jaeschke study 1 [7] – CRQ                                       | NR        | 64.6±4.1       | 1.10±0.45 liters (FEV1)                 | NR                                                                                                        | NR                                                                                                            |
| Jaeschke study 2 [7] – CRQ                                       | 96        | 66±7.3         | 0.93±0.34 liters (FEV1)                 | NR                                                                                                        | NR                                                                                                            |
| Redelmeier [80] – CRQ                                            | 47        | 67±10          | 0.975±0.40 liters (FEV1)                | 3.5 (R 1.2-7.0) dyspnea<br>4.4 (R 1.0-7.0) fatigue<br>5.2 (R 1.7-7.0) emotion<br>5.0 (R 2.0-7.0) mastery  | NR                                                                                                            |
| Wyrwich study 1 [88] – CRQ                                       | NA        | NA             | NA                                      | NA                                                                                                        | NA                                                                                                            |

|                                                      |      |                                                                          |                                         |                                                                                                                     |                                                                                                                     |
|------------------------------------------------------|------|--------------------------------------------------------------------------|-----------------------------------------|---------------------------------------------------------------------------------------------------------------------|---------------------------------------------------------------------------------------------------------------------|
| Wyrwich study 2 [88] – CRQ                           | 64.4 | 50-54 yrs: 11,5%<br>55-64 yrs: 32%<br>65-74 yrs: 37.4%<br>≥75 yrs: 19.2% | NR                                      | NR                                                                                                                  | NR                                                                                                                  |
| Wyrwich study 3 [88] – CRQ                           | NA   | NA                                                                       | NA                                      | NR                                                                                                                  | NR                                                                                                                  |
| <b>EQ-5D Utility Index (UI) and VAS</b>              |      |                                                                          |                                         |                                                                                                                     |                                                                                                                     |
| Nolan study 1 [78] - EQ-5D-5L UI and VAS             | 59.7 | 70.4±9.3                                                                 | 46.1±19.6                               | 0.68±0.24 (UI)<br>61.0±20.6 (VAS)                                                                                   | Only baseline                                                                                                       |
| Nolan study 2 [78] - EQ-5D-5L-UI and VAS             | 59.3 | 70.2 (CI 69.2-71.2)                                                      | 49.8 (CI 47.5-52.0)                     | 0.697 (CI 0.673-0.720) (UI)<br>61.1 (CI 58.9-63.3) (VAS)                                                            | 0.065 (CI 0.047 – 0.083) (UI)<br>8.6 (CI 6.5-10.7) (VAS)                                                            |
| Walters and Brazier [86] – EQ-5D-3L-UI               | 48.7 | 67±10.4 (men)<br>62±10.3 (women)                                         | 47                                      | NR                                                                                                                  | NR                                                                                                                  |
| Zanini [89] – EQ-5D-3L-VAS                           | 82.9 | 71±9                                                                     | 55±20                                   | 58±17 (VAS)                                                                                                         | 14±12 (VAS)                                                                                                         |
| <b>St. George's Respiratory Questionnaire (SGRQ)</b> |      |                                                                          |                                         |                                                                                                                     |                                                                                                                     |
| Alma [70]                                            | 65   | 57.87±6.56                                                               | 50.4±15.11                              | 50.69±17.33 (SGRQ total)<br>63.66±21.77 (SGRQ symptoms)<br>63.58±19.82 (SGRQ activity)<br>39.21±18.81 (SGRQ impact) | -9.04±12.11(SGRQ total)<br>-14.22±21.69 (SGRQ symptoms)<br>-6.71±13.44 (SGRQ activity)<br>-8.78±13.95 (SGRQ impact) |
| Schünemann [81]                                      | 54.8 | 65.8±7.6                                                                 | NR                                      | 52.8±12.7                                                                                                           | -8.1±20.4                                                                                                           |
| Tsiligianni [82]                                     | 90   | 67 (IQR 58-75)                                                           | GOLD I/II/III/IV %:<br>16.7/46.7/30/0.7 | NR                                                                                                                  | NR                                                                                                                  |
| Welling [87]                                         | 36.5 | 60±8.8                                                                   | 26±9                                    | 62±10.9                                                                                                             | -9.8±13.8 (1 month)<br>-7.5±15.8 (6 months)                                                                         |
| <b>SF-6D and SF-36</b>                               |      |                                                                          |                                         |                                                                                                                     |                                                                                                                     |
| Walters [85] –SF-6D                                  | 48.7 | 67±10.4 (men)<br>62±10.3 (women)                                         | 47                                      | NR                                                                                                                  | NR                                                                                                                  |
| Walters [86] – SF-6D                                 | 48.7 | 67±10.4 (men)<br>62±10.3 (women)                                         | 47                                      | NR                                                                                                                  | NR                                                                                                                  |
| Wyrwich study 1 [88] – SF-36                         | NA   | NA                                                                       | NA                                      | NA                                                                                                                  | NA                                                                                                                  |
| Wyrwich study 2 [88] – SF-36                         | 64.4 | 50-54 yrs: 11,5%<br>55-64 yrs: 32%<br>65-74 yrs: 37.4%<br>≥75 yrs: 19.2% | NR                                      | NR                                                                                                                  | NR                                                                                                                  |
| Wyrwich study 3 [88] – SF-36                         | NA   | NA                                                                       | NA                                      | NR                                                                                                                  | NR                                                                                                                  |
|                                                      |      |                                                                          |                                         |                                                                                                                     |                                                                                                                     |
| Kulich [77] – the eDiary                             | 67   | <65 yrs: 44%<br>≥65- <75 yrs: 38.3%<br>≥75 yrs: 17.7%                    | NR                                      | Mean range 2.12-3.20                                                                                                | Mean range 1.68-2.60 (follow-up score)                                                                              |
| Perez [79] – VSRQ                                    | 84.9 | 64.3±10.0                                                                | 46.81                                   | 44.58±15.96                                                                                                         | 49.72±16.44 (follow-up score)                                                                                       |
| Schünemann [81] – FT                                 | 54.8 | 65.8±7.6                                                                 | NR                                      | 56.8±20.6                                                                                                           | 10.9±20.4                                                                                                           |



|                                                                                                                                                                                                                                                                                                                                                                                                                                                                                                                                                                                                                                                                                                                                                                                                                                                                                                                                                                                                                                                                                                                                                                                                                                                                              |      |         |           |           |      |
|------------------------------------------------------------------------------------------------------------------------------------------------------------------------------------------------------------------------------------------------------------------------------------------------------------------------------------------------------------------------------------------------------------------------------------------------------------------------------------------------------------------------------------------------------------------------------------------------------------------------------------------------------------------------------------------------------------------------------------------------------------------------------------------------------------------------------------------------------------------------------------------------------------------------------------------------------------------------------------------------------------------------------------------------------------------------------------------------------------------------------------------------------------------------------------------------------------------------------------------------------------------------------|------|---------|-----------|-----------|------|
| Van Stel [84] - QOLRIQ                                                                                                                                                                                                                                                                                                                                                                                                                                                                                                                                                                                                                                                                                                                                                                                                                                                                                                                                                                                                                                                                                                                                                                                                                                                       | 53.6 | 60.4±11 | 36.6±14.1 | 3.77±0.90 | 0.82 |
| <p><i>Data:</i> Age (yrs) reported as mean±SD, mean (95%CI), or median (IQR). Spirometry reported for FEV1% predicted as mean±SD or mean (95%CI); for GOLD category as %; for FEV1 mean±SD in liters. Health status baseline, follow-up and/or change scores reported as mean±SD, mean (95%CI), median (IQR), mean (R) or mean range of scores.</p> <p><i>Abbreviations:</i> 95%CI, 95% Confidence Interval; CAT, COPD Assessment Test; CCQ, Clinical COPD Questionnaire; (SF-)CRQ, (Short-Form) Chronic Respiratory Questionnaire; EQ-5D-3L-UI, EuroQol 5 Dimension 3 Levels Utility Index; EQ-5D-3L-VAS, EuroQol 5 Dimension 3 Levels Visual Analogue Scale; EQ-5D-5L-UI, EuroQol 5 Dimension 5 Levels Utility Index; EQ-5D-5L-VAS, EuroQol 5 Dimension 5 Levels Visual Analogue Scale; FEV1, Forced Expiratory Volume in 1 second; FEV1%pred, Forced Expiratory Volume in 1 second % predicted; FT, Feeling Thermometer; GOLD, Global Initiative for Obstructive Lung Diseases; IQR, InterQuartile Range; N, Number of Patients; NA, Not Applicable; NR, Not Reported; QOLRIQ, Quality of Life for Respiratory Illness Questionnaire; R, Range; SD, Standard Deviation; SF-6D/SF-36, Short-Form 6D/36; VSRQ, Visual Simplified Respiratory Questionnaire; Yrs, Years.</p> |      |         |           |           |      |

*Supplementary Table S5: Overview of patients' inclusion- and exclusion criteria of the included studies in alphabetical order*

| First author(s):  | Inclusion- and exclusion criteria:                                                                                                                                                                                                                                                                                                                                                                                                                                                                                                                                          |
|-------------------|-----------------------------------------------------------------------------------------------------------------------------------------------------------------------------------------------------------------------------------------------------------------------------------------------------------------------------------------------------------------------------------------------------------------------------------------------------------------------------------------------------------------------------------------------------------------------------|
| Alma [70]         | Patients $\geq 18$ years diagnosis COPD GOLD II-IV with informed consent and ability to understand questionnaires. No hypercapnic failure; no contra-indications for IMT; no co-morbidities greater than COPD; no other respiratory co-morbidities; no $\alpha 1$ -antitrypsin deficiency.                                                                                                                                                                                                                                                                                  |
| Chu-Lin Tsai [71] | Patients $\geq 55$ years, physician-based COPD diagnosis, presenting at ED with COPD exacerbation (increasing shortness of breath, worsening cough, or change in sputum production), ability to give informed consent.                                                                                                                                                                                                                                                                                                                                                      |
| Dodd [72]         | Patients with clinical diagnosis of COPD, referred for PR.                                                                                                                                                                                                                                                                                                                                                                                                                                                                                                                  |
| Jaeschke [7]      | Study 1) Eligible for PR; shortness of breath during $\geq 3$ daily activities; FEV1 < 70% of predicted; informed consent. No previous admission to PR; no inability to complete questionnaires; no inability to perform 6MWD.<br><br>Study 2) FEV1 < 70% predicted and ratio < 0.7 with FVC. No reversibility. Signs of exertional dyspnea with inability to perform $\geq 3$ daily activities. Excluded if in previous clinical trial with oral steroids FEV1 improved 25% or more. No asthma diagnosis. No prior hospitalization or exacerbation in previous two months. |
| Jones [73]        | Study 1) Patients 40-80 years, physician-based COPD diagnosis (GOLD criteria), ability to read English. No asthma; no other active chronic respiratory disease; no other severe uncontrolled co-morbidity.<br><br>Study 2) Like study 1, except patients had to be stable for 6 weeks. No history of unstable angina or myocardial infarction in past month; no resting heart rate > 120 beats/min; no systolic blood pressure > 180 mm Hg; no diastolic blood pressure > 100 mm Hg.                                                                                        |
| Kocks [74]        | Patients $\geq 40$ years, with COPD diagnosis (ATS criteria), admitted with acute exacerbation, smoking history of > 10 pack-years, informed/written consent. No asthma; no prednisolone allergy; no chest X-ray not consistent with COPD; no participation other trial; no acidosis; no severe comorbidity; no inability to follow instructions.                                                                                                                                                                                                                           |
| Kon [75]          | Study 1) Stable patients $\geq 35$ years, diagnosis of COPD, ability to walk 5m, no contra-indications for PR, ability to read and understand English.<br><br>Study 2) Patients $\geq 35$ years, acute COPD exacerbation as diagnosed by physician, admission > 24 hours to acute ward, ability to read and understand English.<br><br>Study 3) Stable patients $\geq 35$ years, diagnosis of COPD, no exacerbation past 4 weeks, ability to read and understand English.                                                                                                   |
| Kon [76]          | COPD diagnosis (GOLD criteria), clinical indication for PR (BTS guidelines), no exacerbation past 6 weeks, no contra-indication for exercise, no neurologic limitations to walking, no PR in previous 12 months.                                                                                                                                                                                                                                                                                                                                                            |
| Kulich [77]       | Patients $\geq 40$ years, COPD GOLD II or III, packyears $\geq 10$ .                                                                                                                                                                                                                                                                                                                                                                                                                                                                                                        |
| Nolan [78]        | Study 1) COPD patients (GOLD criteria) in outpatient clinics Harefield Hospital.<br><br>Study 2) COPD patients (GOLD) in PR clinics Harefield Hospital. Able to walk 5m without assistance. No contra-indications for aerobics.                                                                                                                                                                                                                                                                                                                                             |
| Perez [79]        | Patients $\geq 40$ years, clinical diagnosis mild/moderate/severe COPD (ATS criteria), smoking history $\geq 10$ years, no asthma; no allergic rhinitis; no atopy; no oxygen usage; no recent respiratory tract infection previous 6 weeks; no history of myocardial infarction or arrhythmias previous 6 months; no hospitalization for pulmonary edema or heart failure previous 3 years.                                                                                                                                                                                 |
| Redelmeier [80]   | COPD patients in PR, came from community, maximal medical therapy, agreed to participate. No other active comorbidities; no poor motivation; no unrealistic expectations; no inadequate comprehension; no acute exacerbation.                                                                                                                                                                                                                                                                                                                                               |
| Schünemann [81]   | All inpatients and outpatients with Chronic Airflow Limitation (CAL) enrolled in PR. No $\alpha 1$ -antitrypsin deficiency, silicosis, sarcoidosis, asbestosis, lupus, or cancer, and no inability to complete questionnaires.                                                                                                                                                                                                                                                                                                                                              |
| Smid [82]         | Patients 40-85 years with mild-very severe COPD (GOLD guidelines), enrolled in PR at CIRO institute after assessment in Horn, the Netherlands, providing informed consent.                                                                                                                                                                                                                                                                                                                                                                                                  |
| Tsiligianni [83]  | Patients $\geq 45$ years, smoking history $\geq 10$ years, COPD diagnosis by physician and spirometry (FEV1/FVC < 0.7), no asthma; no unstable cardio-vascular disease; no other respiratory conditions.                                                                                                                                                                                                                                                                                                                                                                    |
| Van Stel [84]     | Pulmonologist diagnosis of asthma and/or COPD (ERS), patients enrolled in and completing PR, able to speak and understand Dutch.                                                                                                                                                                                                                                                                                                                                                                                                                                            |
| Walters [85]      | Patients $\geq 35$ years, native English speaking, clinical COPD diagnosis. No asthma; no occupational lung fibrosis; no                                                                                                                                                                                                                                                                                                                                                                                                                                                    |

|                                                                                                                                                                                                                                                                                                                                                                                                                                                                                                                                        |                                                                                                                                                                                                                                                                                                                                   |
|----------------------------------------------------------------------------------------------------------------------------------------------------------------------------------------------------------------------------------------------------------------------------------------------------------------------------------------------------------------------------------------------------------------------------------------------------------------------------------------------------------------------------------------|-----------------------------------------------------------------------------------------------------------------------------------------------------------------------------------------------------------------------------------------------------------------------------------------------------------------------------------|
|                                                                                                                                                                                                                                                                                                                                                                                                                                                                                                                                        | pulmonary malignancy; no spirometry with FEV1>70%FVC or FEV1<70%FVC with reversibility.                                                                                                                                                                                                                                           |
| Walters [86]                                                                                                                                                                                                                                                                                                                                                                                                                                                                                                                           | Patients ≥35 years, native English speaking, clinical COPD diagnosis. No asthma; no occupational lung fibrosis; no pulmonary malignancy; no spirometry with FEV1>70%FVC or FEV1<70%FVC with reversibility.                                                                                                                        |
| Welling [87]                                                                                                                                                                                                                                                                                                                                                                                                                                                                                                                           | Different per individual trial: COPD patients included if follow-up at 1 or 6 months was available incl. SGRQ assessment.                                                                                                                                                                                                         |
| Wyrwich [88]                                                                                                                                                                                                                                                                                                                                                                                                                                                                                                                           | Study 1) Expert Panel, MEDLINE search for CRQ and SF-36, north-American authors, 1995-1999.<br><br>Study 2) Outpatients ≥50 years, physician confirmed COPD, breathing problems past 4 weeks, telephone, adequate hearing.<br><br>Study 3) Primary care physicians with a substantial amount of COPD patients in study 2.         |
| Zanini [89]                                                                                                                                                                                                                                                                                                                                                                                                                                                                                                                            | COPD patients (GOLD criteria), ≥4 sessions PR/week. No exacerbation past 4 weeks; no inability to perform 6MWD; no exacerbation or unstable condition during PR leading to incompleteness; no contra-indications for PR (musculo-skeletal disorders, malignant diseases, unstable cardiac condition); no lack of adherence to PR. |
| <i>Abbreviations:</i> 6MWD, Six Minute Walking Distance; ATS, American Thoracic Society; BTS, British Thoracic Society; CAL, Chronic Airflow Limitations; COPD, Chronic Obstructive Pulmonary Disease; ED, Emergency Department; ERS, European Respiratory Society; FVC, Forced Vital Capacity; FEV1, Forced Expiratory Volume in 1 Second; GOLD, Global Initiative for Obstructive Lung Diseases; IMT, Inspiratory Muscle Training; PR, Pulmonary Rehabilitation; SF-36, Short-Form 36; SGRQ, St. George's Respiratory Questionnaire. |                                                                                                                                                                                                                                                                                                                                   |

Supplementary Table S6: Overview of all MCID methods and estimates

| Study:             | Type:        | Description Method:                                                                                                   | MCID: | Distribution:         | N:  |
|--------------------|--------------|-----------------------------------------------------------------------------------------------------------------------|-------|-----------------------|-----|
| <b>CAT</b>         |              |                                                                                                                       |       |                       |     |
| Alma [70]          | Anchor       | 15-point GRC: mean change patient minimal improvement                                                                 | -3.12 | 95%CI -3.86- to -2.37 | 196 |
| Dodd [72]          | Anchor       | 5-point GRC: mean change patient “feeling little better”                                                              | -1.30 | SD 4.50               | 88  |
| Jones study 1 [73] | Anchor       | 6-point GRC: mean change score for responders                                                                         | -2.80 | SD 4.60               | 33  |
| Dodd [72]          | Anchor       | 5-point GRC: mean change patient “feeling little worse”                                                               | +2.00 | SD 0.00               | 3   |
| Kon study 1 [75]   | Anchor       | 5-point GRC: mean change patient “feeling little better”                                                              | -1.60 | 95%CI -2.60 to -0.80  | 207 |
| Tsiligianni [83]   | Anchor       | 7-point GRC: mean change patient with minimal change                                                                  | ---   | ---                   | 9   |
| Jones study 1 [73] | Anchor       | 6-point GRC by the physician: mean change score for responders                                                        | -2.60 | SD 4.40               | 34  |
| Alma [70]          | Anchor       | Criterion: difference score patients with and without exacerbation during PR                                          | -2.96 | 95%CI -5.20 to -0.71  | 449 |
| Alma [70]          | Anchor       | MCID CCQ total (-0.4): Linear regression analysis                                                                     | -2.45 | 95%CI -2.77 to -2.14  | 449 |
| Alma [70]          | Anchor       | MCID CCQ total (-0.4): mean difference change score between patients failing and patients achieving the anchor’s MCID | -2.74 | ---                   | 449 |
| Alma [70]          | Anchor       | MCID CCQ total (-0.4): ROC Curves                                                                                     | -3.00 | ---                   | 449 |
| Alma [70]          | Anchor       | MCID CCQ total (-0.5): Linear regression analysis                                                                     | -2.81 | 95%CI -3.08 to -2.54  | 449 |
| Alma [70]          | Anchor       | MCID CCQ total (-0.5): mean difference change score between patients failing and patients achieving the anchor’s MCID | -2.82 | ---                   | 449 |
| Alma [70]          | Anchor       | MCID CCQ total (-0.5): ROC Curves                                                                                     | -3.00 | ---                   | 449 |
| Alma [70]          | Anchor       | MCID SGRQ total (-4): Linear regression analysis                                                                      | -1.86 | 95%CI -2.27 to -1.46  | 449 |
| Kon study 1 [75]   | Anchor       | MCID of SGRQ total (-4): Linear regression analysis                                                                   | -2.30 | 95% CI -2.70 to -1.80 | 565 |
| Kon study 2 [75]   | Anchor       | MCID of SGRQ total (-4): Linear regression analysis                                                                   | -2.80 | 95% CI -3.70 to -1.90 | 147 |
| Kon study 3 [75]   | Anchor       | MCID of SGRQ (-4): Linear regression analysis                                                                         | -1.20 | 95%CI -2.50 - 0.00    | 164 |
| Smid [82]          | Anchor       | MCID of SGRQ total (-4): Linear regression analysis                                                                   | -3.50 | ---                   | 419 |
| Alma [70]          | Anchor       | MCID SGRQ total (-4): mean difference change score between patients failing and patients achieving the anchor’s MCID  | -2.45 | ---                   | 449 |
| Alma [70]          | Anchor       | MCID SGRQ total (-4): ROC Curves                                                                                      | -3.00 | ---                   | 449 |
| Kon study 1 [75]   | Anchor       | MCID of SGRQ total (-4): ROC Curves                                                                                   | -2.00 | ---                   | 565 |
| Kon study 2 [75]   | Anchor       | MCID of SGRQ total (-4): ROC Curves                                                                                   | -2.00 | ---                   | 147 |
| Kon study 3 [75]   | Anchor       | MCID of SGRQ (-4): ROC Curves                                                                                         | -1.00 | ---                   | 164 |
| Kon study 3 [75]   | Anchor       | MCID of SGRQ (+4): ROC Curves                                                                                         | +1.00 | ---                   | 164 |
| Smid [82]          | Anchor       | MCID of SGRQ total (-4): ROC Curves                                                                                   | -1.70 | ---                   | 419 |
| Alma [70]          | Anchor       | MCID SGRQ total (-7): Linear regression analysis                                                                      | -2.61 | 95%CI -2.91 to -2.32  | 449 |
| Alma [70]          | Anchor       | MCID SGRQ total (-7): mean difference change score between patients failing and patients achieving the anchor’s MCID  | -2.86 | ---                   | 449 |
| Alma [70]          | Anchor       | MCID SGRQ total (-7): ROC Curves                                                                                      | -3.00 | ---                   | 449 |
| Jones study 1 [73] | Anchor       | MCID of the SGRQ (4) used in direct mapping: 40/100 x MCID SGRQ                                                       | 1.60  | ---                   | 65  |
| Kon study 1 [75]   | Anchor       | MCID CRQ total (+10): ROC Curves                                                                                      | -2.00 | ---                   | 565 |
| Kon study 1 [75]   | Anchor       | MCID CRQ total (+10): Linear regression analysis                                                                      | -1.80 | 95%CI -2.60 to -1.00  | 565 |
| Kon study 1 [75]   | Anchor       | MCID CRQ dyspnea (+2.5): Linear regression analysis                                                                   | -1.70 | 95%CI -2.50 to -1.00  | 565 |
| Kon study 1 [75]   | Anchor       | MCID CRQ fatigue (+2.0): Linear regression analysis                                                                   | -2.00 | 95%CI -2.70 to -1.20  | 565 |
| Kon study 1 [75]   | Anchor       | MCID CRQ emotion (+3.5): Linear regression analysis                                                                   | -2.30 | 95%CI -3.20 to -1.50  | 565 |
| Kon study 1 [75]   | Anchor       | MCID CRQ mastery (+2.0): Linear regression analysis                                                                   | -2.20 | 95%CI -2.90 to -1.50  | 565 |
| Alma [70]          | Distribution | 0.5SD                                                                                                                 | 2.80  | ---                   | 449 |
| Kon study 1 [75]   | Distribution | 0.5SD                                                                                                                 | 3.80  | ---                   | 565 |
| Kon study 2 [75]   | Distribution | 0.5SD                                                                                                                 | 3.70  | ---                   | 147 |
| Kon study 3 [75]   | Distribution | 0.5SD                                                                                                                 | 3.80  | ---                   | 164 |
| Smid [82]          | Distribution | 0.5SD                                                                                                                 | 3.40  | ---                   | 419 |
| Alma [70]          | Distribution | SEM                                                                                                                   | 3.28  | ---                   | 449 |
| Kon study 1 [75]   | Distribution | SEM                                                                                                                   | 3.30  | ---                   | 565 |
| Kon study 2 [75]   | Distribution | SEM                                                                                                                   | 3.30  | ---                   | 147 |
| Kon study 3 [75]   | Distribution | SEM                                                                                                                   | 3.40  | ---                   | 164 |
| Smid [82]          | Distribution | SEM                                                                                                                   | 2.90  | ---                   | 419 |
| Tsiligianni [83]   | Distribution | SEM                                                                                                                   | 1.92  | ---                   | 90  |
| Alma [70]          | Distribution | 1.96SEM                                                                                                               | 6.43  | ---                   | 449 |
| Tsiligianni [83]   | Distribution | 1.96 SEM                                                                                                              | 3.76  | ---                   | 90  |

| CCQ              |              |                                                                                                                                             |           |                       |     |
|------------------|--------------|---------------------------------------------------------------------------------------------------------------------------------------------|-----------|-----------------------|-----|
| Alma [70]        | Anchor       | 15-point GRC: mean change patient minimal improvement                                                                                       | -0.56 (T) | 95% CI -0.68 to -0.44 | 196 |
| Kocks [74]       | Anchor       | 15-point GRC day 2: mean change patient minimal improvement                                                                                 | ---       | ---                   | 15  |
| Kocks [74]       | Anchor       | 15-point GRC day 3: mean change patient minimal improvement                                                                                 | -0.44 (T) | SD 0.66               | 20  |
| Alma [70]        | Anchor       | Like CCQ Total                                                                                                                              | -0.55 (S) | ---                   | 196 |
| Kocks [74]       | Anchor       | Like CCQ Total                                                                                                                              | -0.70 (S) | SD 1.09               | 15  |
| Kocks [74]       | Anchor       | Like CCQ Total                                                                                                                              | -0.74 (S) | SD 0.93               | 20  |
| Alma [70]        | Anchor       | Like CCQ Total                                                                                                                              | -0.55 (F) | ---                   | 196 |
| Kocks [74]       | Anchor       | Like CCQ Total                                                                                                                              | ---       | ---                   | 15  |
| Kocks [74]       | Anchor       | Like CCQ Total                                                                                                                              | ---       | ---                   | 20  |
| Alma [70]        | Anchor       | Like CCQ Total                                                                                                                              | -0.58 (M) | ---                   | 196 |
| Kocks [74]       | Anchor       | Like CCQ Total                                                                                                                              | -1.00 (M) | ---                   | 15  |
| Kocks [74]       | Anchor       | Like CCQ Total                                                                                                                              | ---       | ---                   | 20  |
| Tsiligianni [83] | Anchor       | 7-point GRC: mean change patient with minimal change                                                                                        | ---       | ---                   | 9   |
| Alma [70]        | Anchor       | Criterion: difference score patients with and without exacerbation during PR                                                                | -0.62 (T) | 95% CI -0.98 to -0.27 | 449 |
| Kocks [74]       | Anchor       | Criterion: difference score patients at day 42 between death/rehospitalization and survival/no rehospitalization during 12 months follow-up | -0.39 (T) | 95% CI -0.71 to -0.07 | 168 |
| Alma [70]        | Anchor       | Like CCQ Total                                                                                                                              | -0.47 (S) | ---                   | 449 |
| Kocks [74]       | Anchor       | Like CCQ Total                                                                                                                              | ---       | ---                   | 168 |
| Alma [70]        | Anchor       | Like CCQ Total                                                                                                                              | -0.67 (F) | ---                   | 449 |
| Kocks [74]       | Anchor       | Like CCQ Total                                                                                                                              | -0.77 (F) | 95% CI -1.19 to -0.34 | 168 |
| Alma [70]        | Anchor       | Like CCQ Total                                                                                                                              | -0.86 (M) | ---                   | 449 |
| Kocks [74]       | Anchor       | Like CCQ Total                                                                                                                              | 0 (M)     | ---                   | 168 |
| Alma [70]        | Anchor       | MCID CAT (-2): Linear regression analysis                                                                                                   | -0.48 (T) | 95% CI -0.53 to -0.42 | 449 |
| Alma [70]        | Anchor       | MCID CAT (-2): mean difference change score between patients failing and patients achieving anchor's MCID                                   | -0.48 (T) | ---                   | 449 |
| Kon [76]         | Anchor       | MCID CAT (-2): mean difference change score between patients failing and patients achieving anchor's MCID                                   | -0.43 (T) | ---                   | 261 |
| Alma [70]        | Anchor       | MCID CAT (-2): ROC Curves                                                                                                                   | -0.50 (T) | ---                   | 449 |
| Kon [76]         | Anchor       | MCID CAT (-2): ROC Curves                                                                                                                   | -0.40 (T) | ---                   | 261 |
| Alma [70]        | Anchor       | MCID CAT (-3): Linear regression analysis                                                                                                   | -0.57 (T) | 95% CI -0.61 to -0.53 | 449 |
| Alma [70]        | Anchor       | MCID CAT (-3): mean difference change score between patients failing and patients achieving anchor's MCID                                   | -0.56 (T) | ---                   | 449 |
| Alma [70]        | Anchor       | MCID CAT (-3): ROC Curves                                                                                                                   | -0.60 (T) | ---                   | 449 |
| Alma [70]        | Anchor       | MCID SGRQ total (-4): Linear regression analysis                                                                                            | -0.34 (T) | 95% CI -0.40 to -0.28 | 449 |
| Smid [82]        | Anchor       | MCID SGRQ total (-4): Linear regression analysis                                                                                            | -0.40 (T) | ---                   | 419 |
| Alma [70]        | Anchor       | MCID SGRQ total (-4): mean difference change score between patients failing and achieving anchor's MCID                                     | -0.46 (T) | ---                   | 449 |
| Kon [76]         | Anchor       | MCID SGRQ (-4): mean difference change score between patients failing and achieving anchor's MCID                                           | -0.47 (T) | ---                   | 261 |
| Alma [70]        | Anchor       | MCID SGRQ total (-4): ROC Curves                                                                                                            | -0.50 (T) | ---                   | 449 |
| Kon [76]         | Anchor       | MCID SGRQ total (-4): ROC Curves                                                                                                            | -0.40 (T) | ---                   | 261 |
| Smid [82]        | Anchor       | MCID SGRQ total (-4): ROC Curves                                                                                                            | -0.40 (T) | ---                   | 419 |
| Alma [70]        | Anchor       | MCID SGRQ total (-7): Linear regression analysis                                                                                            | -0.48 (T) | 95% CI -0.53 to -0.44 | 449 |
| Alma [70]        | Anchor       | MCID SGRQ total (-7): mean difference change score between patients failing and achieving anchor's MCID                                     | -0.53 (T) | ---                   | 449 |
| Alma [70]        | Anchor       | MCID SGRQ total (-7): ROC Curves                                                                                                            | -0.60 (T) | ---                   | 449 |
| Kon [76]         | Anchor       | MCID CRQ total (+10): ROC Curves                                                                                                            | -0.40 (T) | ---                   | 261 |
| Kon [76]         | Anchor       | MCID CRQ total (+10): mean difference change score between patients failing and achieving anchor's MCID                                     | -0.40 (T) | ---                   | 261 |
| Alma [70]        | Distribution | 0.5SD                                                                                                                                       | 0.46 (T)  | ---                   | 449 |
| Kon [76]         | Distribution | 0.5SD                                                                                                                                       | 0.48 (T)  | ---                   | 261 |
| Smid [82]        | Distribution | 0.5SD                                                                                                                                       | 0.50 (T)  | ---                   | 419 |
| Alma [70]        | Distribution | SEM                                                                                                                                         | 0.29 (T)  | ---                   | 449 |
| Kocks [74]       | Distribution | SEM                                                                                                                                         | 0.21 (T)  | ---                   | 168 |
| Kon [76]         | Distribution | SEM                                                                                                                                         | 0.29 (T)  | ---                   | 261 |
| Smid [82]        | Distribution | SEM                                                                                                                                         | 0.20 (T)  | ---                   | 419 |
| Tsiligianni [83] | Distribution | SEM                                                                                                                                         | 0.21 (T)  | ---                   | 90  |
| Alma [70]        | Distribution | 1.96SEM                                                                                                                                     | 0.56 (T)  | ---                   | 449 |
| Tsiligianni [83] | Distribution | 1.96 SEM                                                                                                                                    | 0.41 (T)  | ---                   | 90  |
| Kon [76]         | Distribution | MDC95                                                                                                                                       | 0.80 (T)  | ---                   | 168 |

| <b>(SF)-CRQ</b>      |              |                                                                                                                                                                  |               |                    |     |
|----------------------|--------------|------------------------------------------------------------------------------------------------------------------------------------------------------------------|---------------|--------------------|-----|
| Chu-Lin Tsai [71]    | Anchor       | 5-point GRC: mean change patient “feeling little better”                                                                                                         | 1.01 (T)      | 95%CI 0.72 to 1.31 | --- |
| Chu-Lin Tsai [71]    | Anchor       | 5-point GRC: mean change patient “feeling little better”                                                                                                         | 1.60 (D)      | ---                | --- |
| Chu-Lin Tsai [71]    | Anchor       | 5-point GRC: mean change patient “feeling little better”                                                                                                         | 0.80 (F)      | ---                | --- |
| Chu-Lin Tsai [71]    | Anchor       | 5-point GRC: mean change patient “feeling little better”                                                                                                         | 0.30 (E)      | ---                | --- |
| Chu-Lin Tsai [71]    | Anchor       | 5-point GRC: mean change patient “feeling little better”                                                                                                         | 1.10 (M)      | ---                | --- |
| Chu-Lin Tsai [71]    | Anchor       | 5-point GRC: mean change patient “feeling little worse”                                                                                                          | -0.60 (D)     | ---                | --- |
| Chu-Lin Tsai [71]    | Anchor       | 5-point GRC: mean change patient “feeling little worse”                                                                                                          | -0.10 (F)     | ---                | --- |
| Chu-Lin Tsai [71]    | Anchor       | 5-point GRC: mean change patient “feeling little worse”                                                                                                          | -0.60 (E)     | ---                | --- |
| Chu-Lin Tsai [71]    | Anchor       | 5-point GRC: mean change patient “feeling little worse”                                                                                                          | -0.06 (M)     | ---                | --- |
| Wyrwich study 2 [88] | Anchor       | 15-point GRC: mean change patient small improvement                                                                                                              | 2.00 (D)      | ---                | 212 |
| Wyrwich study 2 [88] | Anchor       | 15-point GRC: mean change patient small improvement                                                                                                              | 1.00 (F)      | ---                | 266 |
| Wyrwich study 2 [88] | Anchor       | 15-point GRC: mean change patient small improvement                                                                                                              | 1.00 (E)      | ---                | 197 |
| Wyrwich study 2 [88] | Anchor       | 15-point GRC: mean change patient small improvement                                                                                                              | 1.00 (M)      | ---                | 247 |
| Wyrwich study 2 [88] | Anchor       | 15-point GRC: mean change patient small deterioration                                                                                                            | -1.00 (D)     | ---                | 313 |
| Wyrwich study 2 [88] | Anchor       | 15-point GRC: mean change patient small deterioration                                                                                                            | -2.00 (F)     | ---                | 208 |
| Wyrwich study 2 [88] | Anchor       | 15-point GRC: mean change patient small deterioration                                                                                                            | -1.00 (E)     | ---                | 349 |
| Wyrwich study 2 [88] | Anchor       | 15-point GRC: mean change patient small deterioration                                                                                                            | -2.00 (M)     | ---                | 158 |
| Jaeschke study 1 [7] | Anchor       | 15-point GRC: mean change patient minimal change                                                                                                                 | 2.38 (D)      | ---                | 16  |
| Jaeschke study 1 [7] | Anchor       | 15-point GRC: mean change patient minimal change                                                                                                                 | 2.20 (F)      | ---                | 15  |
| Jaeschke study 1 [7] | Anchor       | 15-point GRC: mean change patient minimal change                                                                                                                 | 5.60 (E)      | ---                | 5   |
| Jaeschke study 2 [7] | Anchor       | 15-point GRC: mean change patient minimal change                                                                                                                 | 3.11 (D)      | ---                | 9   |
| Jaeschke study 2 [7] | Anchor       | 15-point GRC: mean change patient minimal change                                                                                                                 | 2.70 (F)      | ---                | 10  |
| Jaeschke study 2 [7] | Anchor       | 15-point GRC: mean change patient minimal change                                                                                                                 | 4.00 (E)      | ---                | 8   |
| Wyrwich study 3 [88] | Anchor       | 15-point GRC: mean change physician small improvement                                                                                                            | 5.00 (D)      | ---                | 15  |
| Wyrwich study 3 [88] | Anchor       | 15-point GRC: mean change physician small improvement                                                                                                            | 2.00 (F)      | ---                | 15  |
| Wyrwich study 3 [88] | Anchor       | 15-point GRC: mean change physician small improvement                                                                                                            | 1.00 (E)      | ---                | 15  |
| Wyrwich study 3 [88] | Anchor       | 15-point GRC: mean change physician small improvement                                                                                                            | 0 (M)         | ---                | 15  |
| Wyrwich study 3 [88] | Anchor       | 15-point GRC: mean change physician small deterioration                                                                                                          | -1.00 (D)     | ---                | 30  |
| Wyrwich study 3 [88] | Anchor       | 15-point GRC: mean change physician small deterioration                                                                                                          | -2.00 (F)     | ---                | 30  |
| Wyrwich study 3 [88] | Anchor       | 15-point GRC: mean change physician small deterioration                                                                                                          | 0 (E)         | ---                | 30  |
| Wyrwich study 3 [88] | Anchor       | 15-point GRC: mean change physician small deterioration                                                                                                          | -1.00 (M)     | ---                | 30  |
| Redelmeier [80]      | Anchor       | 7-point Subjective Comparison Ratings Scale between patients: mean difference scores for patients feeling “a little better” or “little worse” compared to others | 0.09 (D)      | ---                | --- |
| Redelmeier [80]      | Anchor       | 7-point Subjective Comparison Ratings Scale between patients: mean difference scores for patients feeling “a little better” or “little worse” compared to others | 0.50 (F)      | ---                | --- |
| Redelmeier [80]      | Anchor       | 7-point Subjective Comparison Ratings Scale between patients: mean difference scores for patients feeling “a little better” or “little worse” compared to others | 0.87 (E)      | ---                | --- |
| Redelmeier [80]      | Anchor       | 7-point Subjective Comparison Ratings Scale between patients: mean difference scores for patients feeling “a little better” or “little worse” compared to others | 0.23 (M)      | ---                | --- |
| Redelmeier [80]      | Anchor       | 7-point Subjective Comparison Ratings Scale between patients: mean difference scores for patients feeling “a little better” or “little worse” compared to others | 0.53 (pooled) | 95% CI 0.39-0.67   | --- |
| Chu-Lin Tsai [71]    | Distribution | SEM                                                                                                                                                              | 0.55          | ---                | 301 |
| Wyrwich study 1 [88] | Opinion      | Delphi rounds of consensus by expert panel                                                                                                                       | 3.00 (D)      | ---                | 9   |
| Wyrwich study 1 [88] | Opinion      | Delphi rounds of consensus by expert panel                                                                                                                       | 2.00 (F)      | ---                | 9   |
| Wyrwich study 1 [88] | Opinion      | Delphi rounds of consensus by expert panel                                                                                                                       | 5.00 (E)      | ---                | 9   |
| Wyrwich study 1 [88] | Opinion      | Delphi rounds of consensus by expert panel                                                                                                                       | 3.00 (M)      | ---                | 9   |

| EQ-5D-UI and VAS   |              |                                                                                         |             |                      |     |
|--------------------|--------------|-----------------------------------------------------------------------------------------|-------------|----------------------|-----|
| Nolan study 2 [78] | Anchor       | 5-point GRC: mean change patient “feeling little better”                                | 6.99 (VAS)  | 95% CI 3.78 to 10.20 | 124 |
| Nolan study 2 [78] | Anchor       | 5-point GRC: mean change patient “feeling little better”                                | 0.054 (UI)  | 95% CI 0.028 to 0.08 | 124 |
| Walters [86]       | Anchor       | 5-point GRC: mean change patient “somewhat better” after 6 months                       | -0.128 (UI) | SD 0.155             | 9   |
| Walters [86]       | Anchor       | 5-point GRC: mean change patient “somewhat better” after 12 months                      | 0.013 (UI)  | SD 0.185             | 9   |
| Walters [86]       | Anchor       | 5-point GRC: mean change patient “somewhat worse” after 6 months                        | 0.039 (UI)  | SD 0.222             | 21  |
| Walters [86]       | Anchor       | 5-point GRC: mean change patient “somewhat worse” after 12 months                       | -0.007 (UI) | SD 0.236             | 16  |
| Walters [86]       | Anchor       | 5-point GRC: mean change patient “somewhat better” and “somewhat worse” after 6 months  | -0.011 (UI) | SD 0.216             | 30  |
| Walters [86]       | Anchor       | 5-point GRC: mean change patient “somewhat better” and “somewhat worse” after 12 months | 0.000 (UI)  | SD 0.215             | 25  |
| Nolan study 2 [78] | Anchor       | MCID CRQ dyspnea (+2.5): Linear regression analysis                                     | 6.50 (VAS)  | ---                  | 324 |
| Nolan study 2 [78] | Anchor       | MCID CRQ dyspnea (+2.5): ROC Curves                                                     | 6.50 (VAS)  | ---                  | 324 |
| Nolan study 2 [78] | Anchor       | MCID CRQ fatigue (+2.0): Linear regression analysis                                     | 7.20 (VAS)  | ---                  | 324 |
| Nolan study 2 [78] | Anchor       | MCID CRQ fatigue (+2.0): ROC Curves                                                     | 6.50 (VAS)  | ---                  | 324 |
| Nolan study 2 [78] | Anchor       | MCID CRQ emotion (+3.5): Linear regression analysis                                     | 8.00 (VAS)  | ---                  | 324 |
| Nolan study 2 [78] | Anchor       | MCID CRQ emotion (+3.5): ROC Curves                                                     | 6.50 (VAS)  | ---                  | 324 |
| Nolan study 2 [78] | Anchor       | MCID CRQ mastery (+2.0): Linear regression analysis                                     | 7.60 (VAS)  | ---                  | 324 |
| Nolan study 2 [78] | Anchor       | MCID CRQ mastery (+2.0): ROC Curves                                                     | 6.50 (VAS)  | ---                  | 324 |
| Nolan study 2 [78] | Anchor       | MCID CRQ total (+10): Linear regression analysis                                        | 6.70 (VAS)  | ---                  | 324 |
| Nolan study 2 [78] | Anchor       | MCID CRQ total (+10): ROC Curves                                                        | 6.50 (VAS)  | ---                  | 324 |
| Zanini [89]        | Anchor       | MCID of BDI/TDI (+1): ROC Curves                                                        | 8.00 (VAS)  | ---                  | 439 |
| Nolan study 2 [78] | Anchor       | MCID CRQ emotion (+3.5): Linear regression analysis                                     | 0.063 (UI)  | ---                  | 324 |
| Nolan study 2 [78] | Anchor       | MCID CRQ emotion (+3.5): ROC Curves                                                     | 0.046 (UI)  | ---                  | 324 |
| Nolan study 2 [78] | Anchor       | MCID CRQ mastery (+2.0): Linear regression analysis                                     | 0.062 (UI)  | ---                  | 324 |
| Nolan study 2 [78] | Anchor       | MCID CRQ mastery (+2.0): ROC Curves                                                     | 0.038 (UI)  | ---                  | 324 |
| Nolan study 2 [78] | Anchor       | MCID CRQ total (+10): Linear regression analysis                                        | 0.059 (UI)  | ---                  | 324 |
| Nolan study 2 [78] | Anchor       | MCID CRQ total (+10): ROC Curves                                                        | 0.037 (UI)  | ---                  | 324 |
| Nolan study 2 [78] | Distribution | 0.5SD                                                                                   | 10.1 (VAS)  | ---                  | 324 |
| Nolan study 2 [78] | Distribution | 0.5SD                                                                                   | 0.109 (UI)  | ---                  | 324 |
| Walters [86]       | Distribution | 0.5SD 6 months                                                                          | 0.15 (UI)   | ---                  | 97  |
| Walters [86]       | Distribution | 0.5SD 12 months                                                                         | 0.12 (UI)   | ---                  | 81  |
| Walters [86]       | Distribution | ES 6 months                                                                             | -0.04 (UI)  | ---                  | 97  |
| Walters [86]       | Distribution | ES 12 months                                                                            | 0.00 (UI)   | ---                  | 81  |
| Walters [86]       | Distribution | SRM 6 months                                                                            | -0.05 (UI)  | ---                  | 97  |
| Walters [86]       | Distribution | SRM 12 months                                                                           | 0.00 (UI)   | ---                  | 81  |
| SF-6D              |              |                                                                                         |             |                      |     |
| Walters [85]       | Anchor       | 5-point GRC: mean change patient “somewhat better”                                      | 0.006       | SD 0.074             | 10  |
| Walters [86]       | Anchor       | 5-point GRC: mean change patient “somewhat better” after 6 months                       | 0.054       | SD 0.107             | 9   |
| Walters [86]       | Anchor       | 5-point GRC: mean change patient “somewhat better” after 12 months                      | -0.004      | SD 0.071             | 9   |
| Walters [85]       | Anchor       | 5-point GRC: mean change patient “somewhat worse”                                       | 0.012       | SD 0.095             | 19  |
| Walters [86]       | Anchor       | 5-point GRC: mean change patient “somewhat worse” after 6 months                        | 0.028       | SD 0.083             | 21  |
| Walters [86]       | Anchor       | 5-point GRC: mean change patient “somewhat worse” after 12 months                       | 0.019       | SD 0.100             | 16  |
| Walters [85]       | Anchor       | 5-point GRC: mean change patient “somewhat better” and “somewhat worse”                 | 0.010       | SD 0.087             | 29  |
| Walters [86]       | Anchor       | 5-point GRC: mean change patient “somewhat better” and “somewhat worse” after 6 months  | 0.036       | SD 0.090             | 30  |
| Walters [86]       | Anchor       | 5-point GRC: mean change patient “somewhat better” and “somewhat worse” after 12 months | 0.011       | SD 0.090             | 25  |
| Walters [85]       | Distribution | SRM                                                                                     | 0.11        | 95% CI -0.28 to 0.58 | 60  |
| Walters [86]       | Distribution | SRM 6 months                                                                            | 0.41        | ---                  | 97  |
| Walters [86]       | Distribution | SRM 12 months                                                                           | 0.12        | ---                  | 81  |
| Walters [86]       | Distribution | ES 6 months                                                                             | 0.37        | ---                  | 97  |
| Walters [86]       | Distribution | ES 12 months                                                                            | 0.12        | ---                  | 81  |
| Walters [85]       | Distribution | 0.5SD                                                                                   | 0.044       | ---                  | 60  |
| Walters [86]       | Distribution | 0.5SD 6 months                                                                          | 0.05        | ---                  | 97  |
| Walters [86]       | Distribution | 0.5SD 12 months                                                                         | 0.05        | ---                  | 81  |

|                      |         |                                                         |                     |     |     |
|----------------------|---------|---------------------------------------------------------|---------------------|-----|-----|
| <b>SF-36</b>         |         |                                                         |                     |     |     |
| Wyrwich study 2 [88] | Anchor  | 15-point GRC: mean change patient small improvement     | 4.00 (Physical F)   | --- | 188 |
| Wyrwich study 2 [88] | Anchor  | 15-point GRC: mean change patient small improvement     | 8.00 (R Physical)   | --- | 139 |
| Wyrwich study 2 [88] | Anchor  | 15-point GRC: mean change patient small improvement     | 6.00 (Bodily Pain)  | --- | 144 |
| Wyrwich study 2 [88] | Anchor  | 15-point GRC: mean change patient small improvement     | 3.00 (Gen Health)   | --- | 218 |
| Wyrwich study 2 [88] | Anchor  | 15-point GRC: mean change patient small improvement     | 5.00 (Vitality)     | --- | 199 |
| Wyrwich study 2 [88] | Anchor  | 15-point GRC: mean change patient small improvement     | 6.00 (Social)       | --- | 122 |
| Wyrwich study 2 [88] | Anchor  | 15-point GRC: mean change patient small improvement     | 7.00 (Emotional)    | --- | 150 |
| Wyrwich study 2 [88] | Anchor  | 15-point GRC: mean change patient small improvement     | 4.00 (Mental)       | --- | 181 |
| Wyrwich study 2 [88] | Anchor  | 15-point GRC: mean change patient small deterioration   | -2.00 (Physical F)  | --- | 242 |
| Wyrwich study 2 [88] | Anchor  | 15-point GRC: mean change patient small deterioration   | -3.00 (R Physical)  | --- | 284 |
| Wyrwich study 2 [88] | Anchor  | 15-point GRC: mean change patient small deterioration   | -3.00 (bodily pain) | --- | 314 |
| Wyrwich study 2 [88] | Anchor  | 15-point GRC: mean change patient small deterioration   | -3.00 (Gen Health)  | --- | 406 |
| Wyrwich study 2 [86] | Anchor  | 15-point GRC: mean change patient small deterioration   | -5.00 (Vitality)    | --- | 368 |
| Wyrwich study 2 [88] | Anchor  | 15-point GRC: mean change patient small deterioration   | -6.00 (Social)      | --- | 200 |
| Wyrwich study 2 [88] | Anchor  | 15-point GRC: mean change patient small deterioration   | -5.00 (Emotional)   | --- | 208 |
| Wyrwich study 2 [88] | Anchor  | 15-point GRC: mean change patient small deterioration   | -6.00 (Mental)      | --- | 195 |
| Wyrwich study 3 [88] | Anchor  | 15-point GRC: mean change physician small improvement   | 5.00 (Physical F)   | --- | 15  |
| Wyrwich study 3 [88] | Anchor  | 15-point GRC: mean change physician small improvement   | 9.00 (R Physical)   | --- | 15  |
| Wyrwich study 3 [88] | Anchor  | 15-point GRC: mean change physician small improvement   | 2.00 (Bodily Pain)  | --- | 15  |
| Wyrwich study 3 [88] | Anchor  | 15-point GRC: mean change physician small improvement   | 11.00 (Gen Health)  | --- | 15  |
| Wyrwich study 3 [88] | Anchor  | 15-point GRC: mean change physician small improvement   | 2.00 (Vitality)     | --- | 15  |
| Wyrwich study 3 [88] | Anchor  | 15-point GRC: mean change physician small improvement   | 6.00 (Social)       | --- | 15  |
| Wyrwich study 3 [88] | Anchor  | 15-point GRC: mean change physician small improvement   | 2.00 (Emotional)    | --- | 15  |
| Wyrwich study 3 [88] | Anchor  | 15-point GRC: mean change physician small improvement   | 6.00 (Mental)       | --- | 15  |
| Wyrwich study 3 [88] | Anchor  | 15-point GRC: mean change physician small deterioration | -1.00 (Physical F)  | --- | 30  |
| Wyrwich study 3 [88] | Anchor  | 15-point GRC: mean change physician small deterioration | 3.00 (R Physical)   | --- | 30  |
| Wyrwich study 3 [88] | Anchor  | 15-point GRC: mean change physician small deterioration | -2.00 (bodily pain) | --- | 30  |
| Wyrwich study 3 [88] | Anchor  | 15-point GRC: mean change physician small deterioration | -1.00 (Gen Health)  | --- | 30  |
| Wyrwich study 3 [88] | Anchor  | 15-point GRC: mean change physician small deterioration | 0 (Vitality)        | --- | 30  |
| Wyrwich study 3 [88] | Anchor  | 15-point GRC: mean change physician small deterioration | -5.00 (Social)      | --- | 30  |
| Wyrwich study 3 [88] | Anchor  | 15-point GRC: mean change physician small deterioration | 1.00 (Emotional)    | --- | 30  |
| Wyrwich study 3 [88] | Anchor  | 15-point GRC: mean change physician small deterioration | 4.00 (Mental)       | --- | 30  |
| Wyrwich study 1 [88] | Opinion | Delphi rounds of consensus by expert panel              | 10.00 (Physical F)  | --- | 9   |
| Wyrwich study 1 [88] | Opinion | Delphi rounds of consensus by expert panel              | 12.50 (R Physical)  | --- | 9   |
| Wyrwich study 1 [88] | Opinion | Delphi rounds of consensus by expert panel              | 10.00 (Bodily Pain) | --- | 9   |
| Wyrwich study 1 [88] | Opinion | Delphi rounds of consensus by expert panel              | 10.00 (Gen Health)  | --- | 9   |
| Wyrwich study 1 [88] | Opinion | Delphi rounds of consensus by expert panel              | 12.50 (Vitality)    | --- | 9   |
| Wyrwich study 1 [88] | Opinion | Delphi rounds of consensus by expert panel              | 12.50 (Social)      | --- | 9   |
| Wyrwich study 1 [88] | Opinion | Delphi rounds of consensus by expert panel              | 8.33 (Emotional)    | --- | 9   |
| Wyrwich study 1 [88] | Opinion | Delphi rounds of consensus by expert panel              | 10 (Mental)         | --- | 9   |



| SGRQ             |              |                                                                                                                       |            |                        |     |
|------------------|--------------|-----------------------------------------------------------------------------------------------------------------------|------------|------------------------|-----|
| Alma [70]        | Anchor       | 15-point GRC: mean change patient minimal improvement                                                                 | -8.40 (T)  | 95% CI -10.07 to -6.73 | 196 |
| Alma [70]        | Anchor       | Like SGRQ Total                                                                                                       | -13.12 (S) | ---                    | 196 |
| Alma [70]        | Anchor       | Like SGRQ Total                                                                                                       | -5.90 (A)  | ---                    | 196 |
| Alma [70]        | Anchor       | Like SGRQ Total                                                                                                       | -8.24 (I)  | ---                    | 196 |
| Tsiligianni [83] | Anchor       | 7-point GRC: mean change patient minimal change                                                                       | ---        | ---                    | 9   |
| Alma [70]        | Anchor       | Criterion: difference score patients with and without exacerbation during PR                                          | -9.28 (T)  | 95% CI -14.56 to -3.99 | 449 |
| Alma [70]        | Anchor       | Criterion: difference score patients with and without exacerbation during PR                                          | --- (S)    | ---                    | 449 |
| Alma [70]        | Anchor       | Criterion: difference score patients with and without exacerbation during PR                                          | -10.61 (A) | ---                    | 449 |
| Alma [70]        | Anchor       | Criterion: difference score patients with and without exacerbation during PR                                          | -9.93 (I)  | ---                    | 449 |
| Alma [70]        | Anchor       | MCID CAT (-2): Linear regression analysis                                                                             | -7.73 (T)  | 95% CI -8.48 to -6.98  | 449 |
| Alma [70]        | Anchor       | MCID CAT (-2): mean difference change score between patients failing and patients achieving the anchor's MCID         | -7.78 (T)  | ---                    | 449 |
| Alma [70]        | Anchor       | MCID CAT (-2): ROC Curves                                                                                             | -7.50 (T)  | ---                    | 449 |
| Alma [70]        | Anchor       | MCID CAT (-3): Linear regression analysis                                                                             | -8.89 (T)  | 95% CI -9.47 to -8.31  | 449 |
| Alma [70]        | Anchor       | MCID CAT (-3): mean difference change score between patients failing and patients achieving the anchor's MCID         | -8.69 (T)  | ---                    | 449 |
| Alma [70]        | Anchor       | MCID CAT (-3): ROC Curves                                                                                             | -8.00 (T)  | ---                    | 449 |
| Alma [70]        | Anchor       | MCID CCQ total (-0.4): Linear regression analysis                                                                     | -7.51 (T)  | 95% CI -8.16 to -6.86  | 449 |
| Alma [70]        | Anchor       | MCID CCQ total (-0.4): mean difference change score between patients failing and patients achieving the anchor's MCID | -8.14 (T)  | ---                    | 449 |
| Alma [70]        | Anchor       | MCID CCQ total (-0.4): ROC Curves                                                                                     | -8.30 (T)  | ---                    | 449 |
| Alma [70]        | Anchor       | MCID CCQ total (-0.5): Linear regression analysis                                                                     | -8.35 (T)  | 95% CI -8.90 to -7.79  | 449 |
| Alma [70]        | Anchor       | MCID CCQ total (-0.5): mean difference change score between patients failing and patients achieving the anchor's MCID | -8.36 (T)  | ---                    | 449 |
| Alma [70]        | Anchor       | MCID CCQ total (-0.5): ROC Curves                                                                                     | -8.63 (T)  | ---                    | 449 |
| Schünemann [81]  | Anchor       | MCID CRQ dyspnea (0.5): Linear regression analysis                                                                    | -3.05 (T)  | 95% CI -5.71 to -0.39  | 84  |
| Welling [87]     | Anchor       | MCID of FEV1 (100ml): Linear regression analysis 1M                                                                   | -9.20 (T)  | ---                    | 110 |
| Welling [87]     | Anchor       | MCID of FEV1 (100ml): Linear regression analysis 6M                                                                   | -7.80 (T)  | ---                    | 86  |
| Welling [87]     | Anchor       | MCID of 6MWD (26m): Linear regression analysis 1M                                                                     | -8.50 (T)  | ---                    | 110 |
| Welling [87]     | Anchor       | MCID of 6MWD (26m): Linear regression analysis 6M                                                                     | -6.30 (T)  | ---                    | 86  |
| Welling [87]     | Anchor       | MCID of RV (400ml): Linear regression analysis 1M                                                                     | -8.70 (T)  | ---                    | 110 |
| Welling [87]     | Anchor       | MCID of RV (400ml): Linear regression analysis 6M                                                                     | -6.40 (T)  | ---                    | 86  |
| Schünemann [81]  | Distribution | 0.2SD                                                                                                                 | 2.40 (T)   | ---                    | 84  |
| Alma et al. [70] | Distribution | 0.5SD                                                                                                                 | 6.06 (T)   | ---                    | 449 |
| Schünemann [81]  | Distribution | 0.5SD                                                                                                                 | 5.90 (T)   | ---                    | 84  |
| Welling [87]     | Distribution | 0.5ES (1 month)                                                                                                       | 6.90 (T)   | ---                    | 110 |
| Welling [87]     | Distribution | 0.5ES (6 months)                                                                                                      | 7.90 (T)   | ---                    | 86  |
| Schünemann [81]  | Distribution | 0.8SD                                                                                                                 | 9.40 (T)   | ---                    | 84  |
| Alma et al. [70] | Distribution | SEM                                                                                                                   | 5.20 (T)   | ---                    | 449 |
| Tsiligianni [83] | Distribution | SEM                                                                                                                   | 2.47 (T)   | ---                    | 90  |
| Alma et al. [70] | Distribution | 1.96SEM                                                                                                               | 10.19 (T)  | ---                    | 449 |
| Tsiligianni [83] | Distribution | 1.96 SEM                                                                                                              | 4.84 (T)   | ---                    | 90  |

|                                                                                                                                                                                                                                                                                                                                                                                                                                                                                                                                                                                                                                                                                                                                                                                                                                                                                                                                                                                                                                                                                                                                                                                                                                                                                                                                                                  |              |                                                                                                                           |       |                     |     |
|------------------------------------------------------------------------------------------------------------------------------------------------------------------------------------------------------------------------------------------------------------------------------------------------------------------------------------------------------------------------------------------------------------------------------------------------------------------------------------------------------------------------------------------------------------------------------------------------------------------------------------------------------------------------------------------------------------------------------------------------------------------------------------------------------------------------------------------------------------------------------------------------------------------------------------------------------------------------------------------------------------------------------------------------------------------------------------------------------------------------------------------------------------------------------------------------------------------------------------------------------------------------------------------------------------------------------------------------------------------|--------------|---------------------------------------------------------------------------------------------------------------------------|-------|---------------------|-----|
| <b>Other tools: The eDiary</b>                                                                                                                                                                                                                                                                                                                                                                                                                                                                                                                                                                                                                                                                                                                                                                                                                                                                                                                                                                                                                                                                                                                                                                                                                                                                                                                                   |              |                                                                                                                           |       |                     |     |
| Kulich [77]                                                                                                                                                                                                                                                                                                                                                                                                                                                                                                                                                                                                                                                                                                                                                                                                                                                                                                                                                                                                                                                                                                                                                                                                                                                                                                                                                      | Anchor       | 7-point GRC: mean change score patients scoring “a little better” on the domain “Overall Impact” of the eDiary            | -0.61 | ---                 | --- |
| Kulich [77]                                                                                                                                                                                                                                                                                                                                                                                                                                                                                                                                                                                                                                                                                                                                                                                                                                                                                                                                                                                                                                                                                                                                                                                                                                                                                                                                                      | Anchor       | 7-point GRC: mean change score patients scoring “a little better” on the domain “COPD Severity” of the eDiary             | -0.58 | ---                 | --- |
| Kulich [77]                                                                                                                                                                                                                                                                                                                                                                                                                                                                                                                                                                                                                                                                                                                                                                                                                                                                                                                                                                                                                                                                                                                                                                                                                                                                                                                                                      | Anchor       | TDI rating: mean change score for patient indicating a “minor improvement” for the functional impairment domain           | -0.64 | ---                 | --- |
| Kulich [77]                                                                                                                                                                                                                                                                                                                                                                                                                                                                                                                                                                                                                                                                                                                                                                                                                                                                                                                                                                                                                                                                                                                                                                                                                                                                                                                                                      | Anchor       | TDI rating: mean change score for patient indicating a “minor improvement” for the magnitude of task domain as anchor     | -0.52 | ---                 | --- |
| Kulich [77]                                                                                                                                                                                                                                                                                                                                                                                                                                                                                                                                                                                                                                                                                                                                                                                                                                                                                                                                                                                                                                                                                                                                                                                                                                                                                                                                                      | Anchor       | TDI rating: mean change score for patient indicating a “minor improvement” for the magnitude of effort domain as anchor   | -0.55 | ---                 | --- |
| <b>Other tools: VSRQ</b>                                                                                                                                                                                                                                                                                                                                                                                                                                                                                                                                                                                                                                                                                                                                                                                                                                                                                                                                                                                                                                                                                                                                                                                                                                                                                                                                         |              |                                                                                                                           |       |                     |     |
| Perez [79]                                                                                                                                                                                                                                                                                                                                                                                                                                                                                                                                                                                                                                                                                                                                                                                                                                                                                                                                                                                                                                                                                                                                                                                                                                                                                                                                                       | Anchor       | 15-point GRC: mean change score patients reporting a minimal improvement                                                  | 3.40  | ---                 | 185 |
| Perez [79]                                                                                                                                                                                                                                                                                                                                                                                                                                                                                                                                                                                                                                                                                                                                                                                                                                                                                                                                                                                                                                                                                                                                                                                                                                                                                                                                                       | Anchor       | Median of the Cumulative Response Curves for the minimally improved group drawn upon the dyspnea Overall Treatment Effect | 3.50  | ---                 | 185 |
| Perez [79]                                                                                                                                                                                                                                                                                                                                                                                                                                                                                                                                                                                                                                                                                                                                                                                                                                                                                                                                                                                                                                                                                                                                                                                                                                                                                                                                                       | Anchor       | MCID SGRQ (-4): Linear regression analysis                                                                                | 3.20  | ---                 | 373 |
| <b>Other tools: Feeling Thermometer</b>                                                                                                                                                                                                                                                                                                                                                                                                                                                                                                                                                                                                                                                                                                                                                                                                                                                                                                                                                                                                                                                                                                                                                                                                                                                                                                                          |              |                                                                                                                           |       |                     |     |
| Schünemann [81]                                                                                                                                                                                                                                                                                                                                                                                                                                                                                                                                                                                                                                                                                                                                                                                                                                                                                                                                                                                                                                                                                                                                                                                                                                                                                                                                                  | Anchor       | MCID CRQ fatigue domain (0.5): Linear regression analysis                                                                 | 6.08  | 95%CI 1.87 to 10.28 | 84  |
| Schünemann [81]                                                                                                                                                                                                                                                                                                                                                                                                                                                                                                                                                                                                                                                                                                                                                                                                                                                                                                                                                                                                                                                                                                                                                                                                                                                                                                                                                  | Anchor       | MCID SGRQ activity domain (4): Linear regression analysis                                                                 | 8.01  | 95%CI 4.12 to 11.90 | 84  |
| Schünemann [81]                                                                                                                                                                                                                                                                                                                                                                                                                                                                                                                                                                                                                                                                                                                                                                                                                                                                                                                                                                                                                                                                                                                                                                                                                                                                                                                                                  | Anchor       | MCID SGRQ impact domain (4): Linear regression analysis                                                                   | 6.47  | 95%CI 2.55 to 10.38 | 84  |
| Schünemann [81]                                                                                                                                                                                                                                                                                                                                                                                                                                                                                                                                                                                                                                                                                                                                                                                                                                                                                                                                                                                                                                                                                                                                                                                                                                                                                                                                                  | Anchor       | MCID SGRQ total (4): Linear regression analysis                                                                           | 6.83  | 95%CI 3.03 to 10.63 | 84  |
| Schünemann [81]                                                                                                                                                                                                                                                                                                                                                                                                                                                                                                                                                                                                                                                                                                                                                                                                                                                                                                                                                                                                                                                                                                                                                                                                                                                                                                                                                  | Distribution | 0.2SD                                                                                                                     | 4.10  | ---                 | 84  |
| Schünemann [81]                                                                                                                                                                                                                                                                                                                                                                                                                                                                                                                                                                                                                                                                                                                                                                                                                                                                                                                                                                                                                                                                                                                                                                                                                                                                                                                                                  | Distribution | 0.5SD                                                                                                                     | 10.20 | ---                 | 84  |
| Schünemann [81]                                                                                                                                                                                                                                                                                                                                                                                                                                                                                                                                                                                                                                                                                                                                                                                                                                                                                                                                                                                                                                                                                                                                                                                                                                                                                                                                                  | Distribution | 0.8SD                                                                                                                     | 16.30 | ---                 | 84  |
| <b>Other tools: QOLRIQ</b>                                                                                                                                                                                                                                                                                                                                                                                                                                                                                                                                                                                                                                                                                                                                                                                                                                                                                                                                                                                                                                                                                                                                                                                                                                                                                                                                       |              |                                                                                                                           |       |                     |     |
| Van Stel [84]                                                                                                                                                                                                                                                                                                                                                                                                                                                                                                                                                                                                                                                                                                                                                                                                                                                                                                                                                                                                                                                                                                                                                                                                                                                                                                                                                    | Anchor       | 5-point GRC: mean absolute difference between patients unchanged and improved                                             | 0.51  | 95%CI 0.04 to 0.98  | 55  |
| Van Stel [84]                                                                                                                                                                                                                                                                                                                                                                                                                                                                                                                                                                                                                                                                                                                                                                                                                                                                                                                                                                                                                                                                                                                                                                                                                                                                                                                                                    | Anchor       | 5-point GRC: mean absolute difference between patients unchanged and deteriorated                                         | 0.49  | 95%CI -0.11 to 1.09 | 28  |
| Van Stel [84]                                                                                                                                                                                                                                                                                                                                                                                                                                                                                                                                                                                                                                                                                                                                                                                                                                                                                                                                                                                                                                                                                                                                                                                                                                                                                                                                                    | Anchor       | Mean absolute change matching a 1 unit change in improved self-assessed health status                                     | 0.64  | ---                 | --- |
| Van Stel [84]                                                                                                                                                                                                                                                                                                                                                                                                                                                                                                                                                                                                                                                                                                                                                                                                                                                                                                                                                                                                                                                                                                                                                                                                                                                                                                                                                    | Anchor       | Mean absolute change matching a 1 unit change in deteriorated self-assessed health status                                 | 0.37  | ---                 | --- |
| Van Stel [84]                                                                                                                                                                                                                                                                                                                                                                                                                                                                                                                                                                                                                                                                                                                                                                                                                                                                                                                                                                                                                                                                                                                                                                                                                                                                                                                                                    | Distribution | 0.2ES                                                                                                                     | 0.18  | ---                 | 108 |
| Van Stel [84]                                                                                                                                                                                                                                                                                                                                                                                                                                                                                                                                                                                                                                                                                                                                                                                                                                                                                                                                                                                                                                                                                                                                                                                                                                                                                                                                                    | Distribution | 0.5ES                                                                                                                     | 0.45  | ---                 | 108 |
| Van Stel [84]                                                                                                                                                                                                                                                                                                                                                                                                                                                                                                                                                                                                                                                                                                                                                                                                                                                                                                                                                                                                                                                                                                                                                                                                                                                                                                                                                    | Distribution | SEM                                                                                                                       | 0.22  | ---                 | 108 |
| <i>Abbreviations:</i> 6MWD, Six Minute Walking Distance; A, Activity score; BDI/TDI, Baseline Dyspnea Index / Transition Dyspnea Index; CAT, COPD Assessment Test; CCQ, Clinical COPD Questionnaire; CI, Confidence Interval; (SF-)CRQ, (Short-Form) Chronic Respiratory Questionnaire; D, Dyspnea score; E, Emotion score; EQ-5D-3L-UI, EuroQol 5 Dimension 3 Levels Utility Index; EQ-5D-3L-VAS, EuroQol 5 Dimension 3 Levels Visual Analogue Scale; EQ-5D-5L-UI, EuroQol 5 Dimension 5 Levels Utility Index; EQ-5D-5L-VAS, EuroQol 5 Dimension 5 Levels Visual Analogue Scale; ES, Effect Size; F, Functional Status or Fatigue score; FEV1, Forced Expiratory Volume in 1 Second; GRC, Global Ratings of Change scale; I, Impact score; M, Mental or Mastery score; MCID, Minimal Clinically Important Difference; MDC95, 95% Minimal Detectable Change level; N, Number of Patients; NS, Not Significant; PR, Pulmonary Rehabilitation; QOLRIQ, Quality of Life for Respiratory Illness Questionnaire; ROC, Receiver Operating Characteristics; RV, Residual Volume; S, Symptoms score; SD, Standard Deviation; SEM, Standard Error of Measurement; SF-36, Short-Form 36; SF-6D, Short Form 6 Dimensions; SGRQ, St. George’s Respiratory Questionnaire; SRM, Standardized Response Mean, T, Total score; VSRQ, Visual Simplified Respiratory Questionnaire; |              |                                                                                                                           |       |                     |     |
